# Supplementary material for: Genomic Mutations of Primary and Metastatic Lung Adenocarcinoma in Chinese Patients
Source: Hindawi journal article supplement (doi:10.1155/2020/6615575), 2020-12-08
Supplement: f1 [file 6615575.f1.zip]

Supplemental Table 1. The metrics of sequence processing for each sample

| ID  | PAIRS     | INSERT<br>SIZE | SEQUENCE<br>ERROR RATE | CONTAMINATION<br>RATIO | SEQUENCE<br>COVERAGE | COVERAGE<br>MEAN | COVERAGE<br>MEDIAN | PERCENT WITH<br>#READS > 150 | MAPPED<br>RATE |
|-----|-----------|----------------|------------------------|------------------------|----------------------|------------------|--------------------|------------------------------|----------------|
| P1  | 26239625  | 205.64         | 0.00303                | 0.00045                | 1748.713             | 1182.585         | 1004.099           | 0.972                        | 0.857          |
| P2  | 32344143  | 233.573        | 0.00404                | 0.0167                 | 1889.512             | 1262.096         | 1135.941           | 0.979                        | 0.87           |
| P3  | 32586629  | 234.342        | 0.0039                 | 0.01414                | 1896.902             | 1266.046         | 1139.915           | 0.979                        | 0.869          |
| P4  | 20807631  | 233.924        | 0.00376                | 0.01127                | 1471.207             | 1130.539         | 1013.476           | 0.972                        | 0.868          |
| P5  | 45844547  | 240.415        | 0.00303                | 0.00191                | 2561.187             | 1199.43          | 1203.63            | 0.996                        | 0.867          |
| P6  | 42087201  | 230.63         | 0.00184                | 0.00263                | 2065.603             | 1325.615         | 1146.472           | 0.988                        | 0.881          |
| P7  | 31217198  | 185.508        | 0.00298                | 0.00208                | 1565.13              | 992.199          | 894.889            | 0.986                        | 0.898          |
| P8  | 22755222  | 233.797        | 0.00397                | 0.00915                | 1542.456             | 1153.86          | 1037.105           | 0.974                        | 0.869          |
| P9  | 25688595  | 258.674        | 0.00184                | 9e-04                  | 1611.944             | 1182.256         | 1034.775           | 0.971                        | 0.837          |
| P10 | 35465633  | 236.652        | 0.00388                | 0.00106                | 1781.416             | 1310.108         | 1253.428           | 0.991                        | 0.9            |
| P11 | 73097528  | 242.2          | 0.00306                | 1e-06                  | 2569.259             | 1557.779         | 1536.227           | 0.997                        | 0.856          |
| P12 | 24465573  | 253.138        | 0.00205                | 0.00067                | 1588.757             | 1166.866         | 962.932            | 0.952                        | 0.849          |
| P13 | 15857375  | 232.368        | 0.00524                | 0.02142                | 1292.434             | 1073.838         | 963.607            | 0.97                         | 0.869          |
| P14 | 40836669  | 234.947        | 0.00138                | 0.00045                | 2310.68              | 1533.071         | 1428.647           | 0.995                        | 0.901          |
| P15 | 37733457  | 260.955        | 0.00131                | 0.00207                | 1851.188             | 1388.064         | 1335.906           | 0.996                        | 0.884          |
| P16 | 66887909  | 247.778        | 0.00275                | 0.00514                | 3335.614             | 1313.246         | 1151.579           | 0.995                        | 0.866          |
| P17 | 39139036  | 232.507        | 0.00452                | 0.01218                | 2134.628             | 1337.949         | 1205.137           | 0.982                        | 0.87           |
| P18 | 14426302  | 246.531        | 0.00748                | 0.00444                | 975.865              | 835.315          | 771.212            | 0.956                        | 0.873          |
| P19 | 33631055  | 230.173        | 0.00321                | 0.00182                | 1666.597             | 1211.451         | 1187.393           | 0.991                        | 0.9            |
| P20 | 2461754   | 236.728        | 0.00323                | 0.0129                 | 807.752              | 922.875          | 823.169            | 0.963                        | 0.868          |
| P21 | 23768126  | 264.244        | 0.00382                | 0.01624                | 1641.929             | 1138.08          | 1110.718           | 0.989                        | 0.871          |
| P22 | 18272974  | 228.473        | 0.00332                | 0.00017                | 1254.42              | 977.309          | 888.806            | 0.965                        | 0.877          |
| P23 | 38576595  | 245.446        | 0.00226                | 0.00028                | 2590.922             | 1658.834         | 1581.374           | 0.993                        | 0.864          |
| P24 | 25792731  | 276.229        | 0.01192                | 0.01575                | 1665.206             | 1146.677         | 1051.084           | 0.987                        | 0.839          |
| P25 | 26913486  | 252.2          | 0.00139                | 0.02607                | 1748.923             | 1218.136         | 1114.108           | 0.982                        | 0.846          |
| P26 | 46717506  | 244.831        | 0.00213                | 0.01917                | 3119.517             | 2012.458         | 1853.616           | 0.997                        | 0.861          |
| P27 | 26327056  | 226.499        | 0.00243                | 0.00064                | 1283.546             | 978.936          | 944.734            | 0.991                        | 0.885          |
| P28 | 25702786  | 241.618        | 0.00368                | 0.02297                | 1791.998             | 1249.21          | 1157.063           | 0.984                        | 0.88           |
| P29 | 34943641  | 260.57         | 0.00167                | 0.00049                | 1900.861             | 1424.202         | 1118.85            | 0.987                        | 0.889          |
| P30 | 21192866  | 249.255        | 0.00177                | 0.00065                | 1404.435             | 1076.541         | 950.89             | 0.981                        | 0.874          |
| P31 | 36132062  | 265.308        | 0.00384                | 0.00202                | 1814.022             | 1299.016         | 1248.512           | 0.993                        | 0.899          |
| P32 | 35828389  | 263.5          | 0.00282                | 0.00042                | 1997.688             | 1560.616         | 1421.36            | 0.996                        | 0.89           |
| P33 | 49122111  | 235.772        | 0.00309                | 0.0052                 | 2495.633             | 1452.07          | 1310.207           | 0.987                        | 0.87           |
| P34 | 42110762  | 221.882        | 0.00212                | 0.00061                | 2424.237             | 1586.725         | 1218.637           | 0.981                        | 0.908          |
| P35 | 45623984  | 228.418        | 0.00176                | 0.00161                | 2054.317             | 1476.59          | 1331.652           | 0.989                        | 0.817          |
| P36 | 48639327  | 218.718        | 0.00159                | 0.00055                | 2794.811             | 1740.058         | 1706.526           | 0.997                        | 0.905          |
| P37 | 29286624  | 243.609        | 0.00198                | 0.00121                | 2153.365             | 1273.26          | 953.788            | 0.942                        | 0.922          |
| P38 | 40926934  | 204.888        | 0.00183                | 0.00197                | 2352.61              | 1565.883         | 1492.229           | 0.995                        | 0.911          |
| P39 | 25005806  | 217.088        | 0.00139                | 0.00042                | 1703.813             | 1074.152         | 989.793            | 0.942                        | 0.864          |
| P40 | 46552881  | 183.162        | 0.00471                | 0.00382                | 2375.302             | 1553.486         | 1368.637           | 0.994                        | 0.915          |
| P41 | 32676060  | 273.651        | 0.0033                 | 0.00117                | 1600.374             | 1190.431         | 1149.505           | 0.991                        | 0.882          |
| P42 | 29464476  | 255.261        | 0.00319                | 0.00102                | 1896.517             | 1348.672         | 1220.477           | 0.984                        | 0.836          |
| P43 | 793247    | 165.6          | 0.00265                | 1e-06                  | 2958.141             | 1302.158         | 916.597            | 0.924                        | 0.821          |
| P44 | 21421172  | 253.234        | 0.00301                | 0.01383                | 1466.007             | 1019.87          | 935.6              | 0.974                        | 0.865          |
| P45 | 58056861  | 207.612        | 0.00298                | 0.00722                | 2233.731             | 1472.855         | 704.866            | 0.931                        | 0.916          |
| P46 | 23045074  | 191.146        | 0.00231                | 0.0024                 | 1313.936             | 881.666          | 673.014            | 0.92                         | 0.912          |
| P47 | 35851206  | 211.659        | 0.00231                | 0.00157                | 2064.691             | 1483.692         | 1487.955           | 0.995                        | 0.918          |
| P48 | 117818829 | 195.614        | 0.00268                | 0.00611                | 5958.082             | 1601.453         | 1536.25            | 0.997                        | 0.869          |
| P49 | 24480702  | 233.838        | 0.00183                | 0.00176                | 1543.78              | 1151.741         | 1063.613           | 0.974                        | 0.824          |
| P50 | 33857226  | 257.209        | 0.00282                | 0.00042                | 1896.993             | 1446.406         | 1263.013           | 0.992                        | 0.896          |
| P51 | 71016047  | 245.344        | 0.00226                | 0.00191                | 4036.473             | 2150.637         | 2112.493           | 0.998                        | 0.89           |
| P52 | 14020868  | 223.634        | 0.00312                | 0.00049                | 947.039              | 770.528          | 698.047            | 0.912                        | 0.879          |
| P53 | 32137873  | 255.757        | 0.00139                | 0.00065                | 1794.13              | 1291.527         | 1223.189           | 0.995                        | 0.896          |
| P54 | 32723279  | 260.071        | 0.003                  | 0.00198                | 1602.629             | 1227.037         | 1158.458           | 0.996                        | 0.885          |
| P55 | 24180791  | 251.482        | 0.00148                | 0.00086                | 1182.635             | 868.69           | 833.738            | 0.979                        | 0.887          |

|      |          |         |         |         |          |          |          |       |       |
|------|----------|---------|---------|---------|----------|----------|----------|-------|-------|
| P56  | 61326375 | 233.865 | 0.00405 | 0.00537 | 2935.536 | 1592.591 | 1442.377 | 0.994 | 0.87  |
| P57  | 3093795  | 233.281 | 0.004   | 1e-06   | 1457.316 | 1266.531 | 1204.645 | 0.999 | 0.777 |
| P58  | 40162318 | 235.605 | 0.00202 | 0.00311 | 1943.129 | 1242.161 | 1227.095 | 0.994 | 0.875 |
| P59  | 29027843 | 227.814 | 0.00224 | 0.00048 | 1401.25  | 1022.659 | 901.711  | 0.962 | 0.862 |
| P60  | 34265216 | 235.644 | 0.00429 | 0.02403 | 1956.232 | 1282.669 | 1154.455 | 0.979 | 0.869 |
| P61  | 22597191 | 231.051 | 0.002   | 0.00044 | 1470.482 | 946.306  | 817.828  | 0.955 | 0.84  |
| P62  | 40856432 | 211.94  | 0.00243 | 0.00095 | 1991.271 | 983.253  | 935.754  | 0.994 | 0.861 |
| P63  | 27164337 | 343.317 | 0.00195 | 0.00056 | 1799.113 | 1284.364 | 890.486  | 0.921 | 0.869 |
| P64  | 37984882 | 252.975 | 0.00182 | 0.00042 | 2102.371 | 1600.123 | 1047.182 | 0.912 | 0.898 |
| P65  | 34387261 | 231.565 | 0.00139 | 0.00041 | 2336.542 | 1486.029 | 1407.911 | 0.989 | 0.871 |
| P66  | 27316458 | 235.044 | 0.00244 | 5e-04   | 1412.922 | 1033.255 | 975.45   | 0.983 | 0.819 |
| P67  | 21950787 | 202.295 | 0.00235 | 0.01553 | 1272.218 | 886.313  | 682.009  | 0.906 | 0.76  |
| P68  | 37597493 | 268.921 | 0.00315 | 0.00046 | 2068.067 | 1478.8   | 1441.966 | 0.996 | 0.88  |
| P69  | 35794060 | 211.329 | 0.00134 | 0.00175 | 2020.782 | 1317.206 | 1283.528 | 0.995 | 0.889 |
| P70  | 14256262 | 235.09  | 0.00394 | 0.01369 | 1234.961 | 1057.375 | 947.898  | 0.969 | 0.868 |
| P71  | 26402653 | 257.936 | 0.00182 | 0.00033 | 1763.299 | 1284.749 | 1157.884 | 0.982 | 0.864 |
| P72  | 23191836 | 243.05  | 0.00382 | 0.02572 | 1605.721 | 1128.169 | 1086.233 | 0.989 | 0.873 |
| P73  | 33793382 | 248.439 | 0.00443 | 0.00041 | 1903.745 | 1052.438 | 1048.314 | 0.994 | 0.882 |
| P74  | 36753515 | 221.457 | 0.00257 | 0.00045 | 2089.141 | 1506.862 | 1377.391 | 0.995 | 0.902 |
| P75  | 39015319 | 234.501 | 0.00169 | 0.00522 | 1917.645 | 1140.742 | 1017.901 | 0.993 | 0.893 |
| P76  | 43434483 | 216.902 | 0.00269 | 0.013   | 2191.19  | 905.101  | 804.172  | 0.977 | 0.882 |
| P77  | 36792722 | 250.004 | 0.00239 | 0.00167 | 2053.203 | 1385.377 | 1326.614 | 0.994 | 0.889 |
| P78  | 30428809 | 261.453 | 0.00372 | 0.00078 | 1689.662 | 1231.848 | 1209.347 | 0.996 | 0.883 |
| P79  | 23764422 | 247.194 | 0.00159 | 0.00059 | 1302.135 | 1046.482 | 751.575  | 0.947 | 0.88  |
| P80  | 22888020 | 227.726 | 0.00273 | 0.00157 | 1278.767 | 890.25   | 833.195  | 0.98  | 0.883 |
| P81  | 25308840 | 233.803 | 0.00362 | 0.02918 | 1634.613 | 1182.47  | 1063.438 | 0.975 | 0.869 |
| P82  | 65267899 | 238.358 | 0.0024  | 0.00357 | 3077.3   | 1633.911 | 1474.96  | 0.995 | 0.87  |
| P83  | 34533447 | 291.611 | 0.00146 | 0.00053 | 2165.003 | 1451.512 | 1273.37  | 0.987 | 0.818 |
| P84  | 15986895 | 233.595 | 0.0039  | 0.01087 | 1295.686 | 1076.497 | 965.801  | 0.97  | 0.869 |
| P85  | 19966047 | 205.833 | 0.00765 | 1e-06   | 1361.691 | 1026.171 | 706.592  | 0.924 | 0.871 |
| P86  | 49030634 | 263.813 | 0.00196 | 0.00147 | 2651.337 | 1892.811 | 1675.182 | 0.995 | 0.889 |
| P87  | 40822702 | 249.616 | 0.00154 | 0.00122 | 2714.245 | 1441.647 | 1274.233 | 0.982 | 0.858 |
| P88  | 24468150 | 252.132 | 0.00353 | 0.00124 | 1364.811 | 1049.425 | 992.024  | 0.985 | 0.888 |
| P89  | 31062462 | 274.638 | 0.00276 | 0.00143 | 1535.44  | 1162.83  | 1030.243 | 0.985 | 0.895 |
| P90  | 25305636 | 256.84  | 0.00293 | 0.00024 | 1783.594 | 1273.94  | 1194.089 | 0.983 | 0.908 |
| P91  | 8863795  | 203.9   | 0.00275 | 1e-06   | 2349.304 | 1810.767 | 1784.67  | 0.999 | 0.802 |
| P92  | 30674492 | 249.46  | 0.00423 | 0.00059 | 1539.613 | 1163.006 | 1073.847 | 0.986 | 0.902 |
| P93  | 21295833 | 245.525 | 0.00223 | 0.01478 | 1488.434 | 1063.697 | 1028.292 | 0.985 | 0.882 |
| P94  | 25058500 | 238.58  | 0.00226 | 0.00311 | 1789.964 | 1079.049 | 772.288  | 0.908 | 0.912 |
| P95  | 35605065 | 195.475 | 0.0029  | 0.00076 | 2016.446 | 1358.332 | 1170.901 | 0.986 | 0.897 |
| P96  | 34735453 | 237.759 | 0.00232 | 9e-04   | 2291.468 | 1520.693 | 1380.169 | 0.991 | 0.852 |
| P97  | 33164938 | 241.504 | 0.00138 | 0.01833 | 1917.228 | 1269.784 | 1145.118 | 0.979 | 0.87  |
| P98  | 33726567 | 218.43  | 0.00309 | 0.0016  | 1772.08  | 1213.132 | 1215.036 | 0.996 | 0.826 |
| P99  | 39621926 | 226.981 | 0.00232 | 0.00164 | 2240.612 | 1465.44  | 1403.172 | 0.996 | 0.899 |
| P100 | 54031121 | 217.994 | 0.00256 | 0.0018  | 3092.53  | 1712.207 | 1730.484 | 0.996 | 0.893 |
| P101 | 86482306 | 192.3   | 0.00358 | 1e-06   | 3445.449 | 1966.638 | 1389.232 | 0.98  | 0.882 |
| P102 | 33323112 | 241.247 | 0.00231 | 0.00201 | 1868.662 | 1387.659 | 1318.709 | 0.994 | 0.896 |
| P103 | 34903825 | 236.543 | 0.00255 | 0.01459 | 1980.978 | 1291.439 | 1162.574 | 0.98  | 0.869 |
| P104 | 43493890 | 276.643 | 0.00167 | 0.00053 | 2907.903 | 2043.772 | 1789.609 | 0.998 | 0.876 |
| P105 | 38044249 | 222.275 | 0.00136 | 0.00037 | 2130.527 | 1438.408 | 1227.169 | 0.989 | 0.891 |
| P106 | 7095404  | 237.899 | 0.00276 | 0.01401 | 975.64   | 973.389  | 869.618  | 0.965 | 0.868 |
| P107 | 20145749 | 252.326 | 0.00154 | 0.02228 | 1339.682 | 938.945  | 853.392  | 0.969 | 0.858 |
| P108 | 20450355 | 224.91  | 0.00154 | 0.01233 | 1361.319 | 910.139  | 796.78   | 0.968 | 0.854 |
| P109 | 34766127 | 249.462 | 0.00226 | 0.00158 | 1841.311 | 1224.544 | 1060.37  | 0.985 | 0.84  |
| P110 | 23839715 | 274.246 | 0.00218 | 0.00067 | 1517.283 | 1000.946 | 946.683  | 0.983 | 0.827 |
| P111 | 25176568 | 223.68  | 0.00195 | 0.00047 | 1641.247 | 1150.795 | 1085.973 | 0.977 | 0.843 |
| P112 | 23936356 | 281.002 | 0.00161 | 0.02381 | 1514.352 | 1083.596 | 817.481  | 0.932 | 0.829 |
| P113 | 33564018 | 288.576 | 0.00203 | 0.00048 | 2219.609 | 1712.593 | 1616.353 | 0.994 | 0.87  |

|      |          |         |         |         |          |          |          |       |       |
|------|----------|---------|---------|---------|----------|----------|----------|-------|-------|
| P114 | 26034893 | 248.439 | 0.00301 | 0.00031 | 1758.857 | 1413.389 | 1266.7   | 0.991 | 0.885 |
| P115 | 62792641 | 197     | 0.00282 | 1e-06   | 2478.307 | 1704.719 | 1588.711 | 0.995 | 0.888 |
| P116 | 16656159 | 226.659 | 0.00699 | 0.01323 | 1320.008 | 1083.761 | 973.803  | 0.97  | 0.868 |
| P117 | 6691156  | 231.011 | 0.00567 | 0.01878 | 961.381  | 970.886  | 869.806  | 0.965 | 0.868 |
| P118 | 27590613 | 283.956 | 0.00135 | 9e-04   | 1768.82  | 1334.011 | 1144.477 | 0.98  | 0.84  |
| P119 | 23726772 | 172.719 | 0.00282 | 0.004   | 1157.77  | 715.118  | 648.086  | 0.929 | 0.888 |
| P120 | 23214064 | 234.142 | 0.00437 | 0.02723 | 1560.037 | 1160.094 | 1042.953 | 0.974 | 0.868 |
| P121 | 30785925 | 254.533 | 0.00274 | 0.00143 | 1533.277 | 1130.729 | 1034.727 | 0.989 | 0.894 |
| P122 | 20712594 | 233.8   | 0.00432 | 0.00952 | 1469.007 | 1128.151 | 1012.435 | 0.972 | 0.869 |
| P123 | 24624876 | 235.276 | 0.00402 | 0.02303 | 1608.226 | 1172.634 | 1053.929 | 0.974 | 0.869 |
| P124 | 65516966 | 234.51  | 0.0042  | 0.01191 | 3087.866 | 1638.121 | 1481.18  | 0.996 | 0.871 |
| P125 | 28785930 | 267.024 | 0.00162 | 0.00055 | 1857.085 | 1357.912 | 1085.956 | 0.983 | 0.837 |
| P126 | 26812324 | 254.412 | 0.0021  | 0.00247 | 1506.879 | 1069.368 | 1043.025 | 0.989 | 0.89  |
| P127 | 42156502 | 238.937 | 0.00242 | 0.00579 | 2243.589 | 1374.191 | 1239.204 | 0.984 | 0.869 |
| P128 | 30030557 | 254.171 | 0.00237 | 0.00168 | 1473.07  | 1103.112 | 1027.239 | 0.993 | 0.901 |
| P129 | 28741640 | 242.151 | 0.00127 | 0.00127 | 1858.283 | 1329.497 | 1093.126 | 0.978 | 0.839 |
| P130 | 40226274 | 220.334 | 0.00356 | 0.00134 | 2321.265 | 1541.926 | 1532.443 | 0.997 | 0.909 |
| P131 | 22148741 | 234.623 | 0.00204 | 0.01731 | 1396.568 | 960.289  | 870.014  | 0.965 | 0.823 |
| P132 | 26052194 | 258.347 | 0.00138 | 0.00296 | 1721.08  | 1192.896 | 1133.527 | 0.983 | 0.854 |
| P133 | 33363563 | 152.4   | 0.00182 | 0.00167 | 2016.32  | 1005.554 | 925.13   | 0.969 | 0.778 |
| P134 | 49929068 | 230.135 | 0.00526 | 0.02092 | 2523.799 | 1461.086 | 1318.989 | 0.988 | 0.87  |
| P135 | 40066241 | 196.6   | 0.00283 | 0.00019 | 1546.736 | 957.885  | 879.538  | 0.969 | 0.87  |
| P136 | 29545085 | 237.833 | 0.00236 | 0.00146 | 1460.369 | 933.929  | 850.079  | 0.96  | 0.885 |
| P137 | 61290757 | 199.9   | 0.00375 | 0.00657 | 2378.208 | 1453.27  | 1445.473 | 0.996 | 0.87  |
| P138 | 37925274 | 225.902 | 0.00446 | 0.00088 | 2188.674 | 1444.985 | 1140.63  | 0.989 | 0.902 |
| P139 | 31284684 | 232.985 | 0.00251 | 0.00037 | 2047.48  | 1485.976 | 1312.531 | 0.983 | 0.845 |
| P140 | 40841248 | 233.811 | 0.00428 | 0.00693 | 2194.827 | 1358.322 | 1225.463 | 0.983 | 0.869 |
| P141 | 45006957 | 269.231 | 0.00212 | 0.00046 | 2509.045 | 1662.851 | 1493.374 | 0.995 | 0.881 |
| P142 | 34958973 | 231.585 | 0.00499 | 0.00181 | 1696.516 | 1190.538 | 1143.303 | 0.991 | 0.865 |
| P143 | 71395124 | 209     | 0.00372 | 0.12221 | 2707.685 | 1477.83  | 1371.339 | 0.995 | 0.856 |
| P144 | 23675192 | 308.464 | 0.0026  | 1e-06   | 1569.713 | 1073.027 | 1026.248 | 0.984 | 0.848 |
| P145 | 41831512 | 238.412 | 0.00225 | 0.01517 | 2232.472 | 1369.805 | 1236.066 | 0.983 | 0.869 |
| P146 | 30307264 | 226.253 | 0.00499 | 0.00042 | 1518.775 | 1122.243 | 1052.262 | 0.989 | 0.903 |
| P147 | 39491191 | 231.865 | 0.00446 | 0.00774 | 2148.089 | 1342.946 | 1208.761 | 0.982 | 0.869 |
| P148 | 38659501 | 249.305 | 0.00315 | 0.00049 | 2196.824 | 1636.417 | 1554.93  | 0.995 | 0.903 |
| P149 | 26398610 | 249.964 | 0.00387 | 0.00168 | 1476.653 | 1055.734 | 1051.141 | 0.991 | 0.892 |
| P150 | 31474441 | 227.714 | 0.01192 | 0.01789 | 2099.951 | 1450.308 | 1238.891 | 0.986 | 0.865 |
| P151 | 30372562 | 213.472 | 0.00172 | 0.00086 | 2085.833 | 1539.903 | 1258.258 | 0.986 | 0.892 |
| P152 | 24645065 | 263.555 | 0.00233 | 0.00104 | 1372.136 | 1066.364 | 1043.127 | 0.987 | 0.89  |
| P153 | 30609882 | 218.37  | 0.0032  | 0.00058 | 1481.518 | 1091.165 | 884.112  | 0.974 | 0.878 |
| P154 | 24505178 | 212.12  | 0.00371 | 0.00309 | 1620.695 | 1068.265 | 908.034  | 0.956 | 0.85  |
| P155 | 36714647 | 300.964 | 0.00204 | 0.0019  | 1733.382 | 1308.664 | 1189.297 | 0.991 | 0.862 |
| P156 | 24662580 | 242.072 | 0.00303 | 0.00041 | 1643.773 | 1282.624 | 1094.296 | 0.979 | 0.86  |
| P157 | 33279199 | 242.107 | 0.00203 | 5e-04   | 1898.58  | 1426.228 | 1202.243 | 0.992 | 0.904 |
| P158 | 18049715 | 236.733 | 0.00341 | 0.01381 | 1369.988 | 1099.138 | 985.561  | 0.971 | 0.868 |
| P159 | 45381507 | 235.584 | 0.00318 | 0.00867 | 2358.971 | 1408.841 | 1272.244 | 0.985 | 0.87  |
| P160 | 13566561 | 236.501 | 0.00313 | 0.01917 | 1210.478 | 1047.399 | 937.893  | 0.969 | 0.869 |
| P161 | 21198506 | 236.056 | 0.00284 | 0.01887 | 1486.139 | 1132.853 | 1016.801 | 0.973 | 0.868 |
| P162 | 30623501 | 257.558 | 0.00195 | 0.00072 | 2153.616 | 1501.758 | 1275.093 | 0.988 | 0.905 |
| P163 | 31900138 | 234.141 | 0.0013  | 0.00051 | 1764.844 | 1331.834 | 1135.377 | 0.984 | 0.89  |
| P164 | 49839990 | 202.024 | 0.00357 | 0.00044 | 2913.391 | 1824.878 | 1791.734 | 0.998 | 0.914 |
| P165 | 14759504 | 230.421 | 0.00544 | 0.01756 | 1252.005 | 1059.168 | 948.739  | 0.969 | 0.868 |
| P166 | 20128311 | 234.001 | 0.0035  | 0.00864 | 1445.501 | 1123.174 | 1008.076 | 0.972 | 0.868 |
| P167 | 43306012 | 221.87  | 0.00399 | 0.01579 | 1524.749 | 933.877  | 943.258  | 0.987 | 0.834 |
| P168 | 70668470 | 270.584 | 0.00303 | 0.00171 | 3938.658 | 1574.169 | 1339.166 | 0.994 | 0.855 |
| P169 | 45716088 | 233.437 | 0.00418 | 0.00702 | 2371.555 | 1414.776 | 1275.983 | 0.985 | 0.869 |
| P170 | 48807834 | 226.148 | 0.0028  | 0.00056 | 2803.736 | 1730.591 | 1723.32  | 0.995 | 0.903 |
| P171 | 3403342  | 226.163 | 0.00639 | 1e-06   | 1260.663 | 1104.818 | 1009.973 | 0.985 | 0.757 |

|      |          |         |         |         |          |          |          |       |       |
|------|----------|---------|---------|---------|----------|----------|----------|-------|-------|
| P172 | 26916270 | 226.503 | 0.00288 | 0.00195 | 1789.477 | 1257.036 | 1222.895 | 0.992 | 0.854 |
| P173 | 26534318 | 267.446 | 0.00129 | 0.00108 | 1248.641 | 918.969  | 828.49   | 0.963 | 0.869 |
| P174 | 52581747 | 211     | 0.00283 | 1e-06   | 2019.761 | 1243.56  | 1198.364 | 0.992 | 0.877 |
| P175 | 26550329 | 221.359 | 0.00188 | 0.00046 | 1483.393 | 1005.738 | 907.476  | 0.977 | 0.884 |
| P176 | 56555558 | 201.398 | 0.00211 | 0.00054 | 2914.292 | 1614.769 | 1374.934 | 0.995 | 0.811 |
| P177 | 25423610 | 232.305 | 0.0045  | 0.01125 | 1638.315 | 1184.705 | 1064.627 | 0.975 | 0.869 |
| P178 | 36323131 | 190.862 | 0.00199 | 0.0061  | 2010.497 | 1295.278 | 1061.447 | 0.981 | 0.885 |
| P179 | 60653636 | 249.92  | 0.00233 | 0.00388 | 3452.31  | 1687.815 | 1314.13  | 0.995 | 0.886 |
| P180 | 30939270 | 243.226 | 0.00273 | 0.00105 | 1554.745 | 1051.128 | 1021.999 | 0.993 | 0.893 |
| P181 | 33000264 | 237.208 | 0.00251 | 0.01739 | 1913.497 | 1271.827 | 1146.417 | 0.979 | 0.869 |
| P182 | 40074198 | 242.68  | 0.00139 | 0.01864 | 2167.316 | 1349.239 | 1215.275 | 0.982 | 0.869 |
| P183 | 16649199 | 233.571 | 0.00332 | 0.10069 | 1120.047 | 905.917  | 732.873  | 0.926 | 0.862 |
| P184 | 25385214 | 216.714 | 0.00324 | 0.00059 | 1660.087 | 1257.644 | 1102.279 | 0.987 | 0.862 |
| P185 | 42399482 | 257.282 | 0.00236 | 0.00174 | 2034.44  | 1332.806 | 1342.683 | 0.997 | 0.864 |
| P186 | 35941610 | 190.468 | 0.00204 | 0.00437 | 1789.416 | 628.16   | 643.265  | 0.963 | 0.856 |
| P187 | 42677404 | 257.17  | 0.00269 | 0.00159 | 2105.037 | 1497.428 | 1445.924 | 0.995 | 0.885 |
| P188 | 27662047 | 251.793 | 0.00293 | 0.00072 | 1549.709 | 1143.472 | 1106.593 | 0.992 | 0.897 |
| P189 | 47869120 | 230.989 | 0.00542 | 0.02098 | 2448.069 | 1438.553 | 1298.853 | 0.987 | 0.87  |
| P190 | 12163393 | 230.976 | 0.00538 | 0.02373 | 1157.183 | 1031.123 | 923.969  | 0.968 | 0.869 |
| P191 | 39861145 | 225.313 | 0.00202 | 0.00115 | 2647.339 | 1628.255 | 1408.735 | 0.994 | 0.848 |
| P192 | 42480543 | 218.561 | 0.00192 | 0.00224 | 2395.101 | 1292.381 | 1300.709 | 0.997 | 0.888 |
| P193 | 69586123 | 222.8   | 0.00327 | 1e-06   | 2903.851 | 1739.917 | 1720.277 | 0.997 | 0.884 |
| P194 | 35571336 | 259.666 | 0.00225 | 0.02631 | 2317.029 | 1532.955 | 1402.901 | 0.993 | 0.843 |
| P195 | 24785049 | 230.28  | 0.00483 | 1e-06   | 1710.487 | 1254.501 | 1187.476 | 0.995 | 0.881 |
| P196 | 39003034 | 232.482 | 0.00475 | 0.01311 | 2126.217 | 1338.393 | 1206.272 | 0.982 | 0.869 |
| P197 | 42141056 | 235.262 | 0.00271 | 0.0015  | 2415.078 | 1687.694 | 1686.897 | 0.996 | 0.909 |
| P198 | 55186150 | 225.692 | 0.00249 | 1e-06   | 1911.318 | 1138.301 | 985.858  | 0.976 | 0.829 |
| P199 | 44099177 | 223.998 | 0.00137 | 0.00475 | 2174.42  | 1420.613 | 1151.766 | 0.99  | 0.907 |
| P200 | 48054700 | 226.948 | 0.00297 | 1e-06   | 1731.339 | 1254.782 | 1225.687 | 0.994 | 0.871 |
| P201 | 34690789 | 255.348 | 0.0033  | 0.00125 | 1721.263 | 1201.231 | 1144.728 | 0.993 | 0.888 |
| P202 | 43991594 | 242.075 | 0.00121 | 0.00024 | 2497.254 | 1786.172 | 1688.105 | 0.996 | 0.902 |
| P203 | 38617267 | 234.759 | 0.0045  | 0.00154 | 2217.477 | 1596.423 | 1378.094 | 0.995 | 0.9   |
| P204 | 35258658 | 287.762 | 0.00373 | 0.01313 | 1615.751 | 1201.046 | 1117.17  | 0.984 | 0.849 |
| P205 | 24957604 | 252.312 | 0.00295 | 0.01282 | 1735.809 | 1045.894 | 1006.317 | 0.982 | 0.87  |
| P206 | 40923596 | 191.513 | 0.00324 | 6e-04   | 2650.731 | 1226.508 | 1062.5   | 0.987 | 0.808 |
| P207 | 50229075 | 215.598 | 0.0033  | 0.00537 | 2492.389 | 1228.439 | 1000.202 | 0.993 | 0.869 |
| P208 | 35186643 | 238.431 | 0.00195 | 0.00986 | 1991.658 | 1293.87  | 1164.325 | 0.98  | 0.869 |
| P209 | 55349783 | 218.376 | 0.00445 | 0.00056 | 3165.868 | 1852.346 | 1840.157 | 0.997 | 0.897 |
| P210 | 42317871 | 263.482 | 0.00371 | 0.15936 | 1449.41  | 872.302  | 794.724  | 0.954 | 0.846 |
| P211 | 3192883  | 246.07  | 0.00467 | 1e-06   | 1195.812 | 1042.45  | 1012.248 | 0.996 | 0.765 |
| P212 | 25287878 | 219.683 | 0.00215 | 0.02136 | 1703.16  | 1018.886 | 935.676  | 0.975 | 0.861 |
| P213 | 35671478 | 243.681 | 0.00156 | 0.00194 | 1786.333 | 1278.33  | 1093.914 | 0.991 | 0.904 |
| P214 | 32221701 | 233.4   | 0.00212 | 0.00051 | 1727.183 | 1287.891 | 1066.251 | 0.979 | 0.856 |
| P215 | 27087988 | 239.987 | 0.00235 | 0.0152  | 1782.632 | 1204.456 | 1150.895 | 0.991 | 0.854 |
| P216 | 33616615 | 232.374 | 0.00444 | 0.00775 | 1932.044 | 1275.454 | 1150.753 | 0.979 | 0.87  |
| P217 | 46678933 | 208.966 | 0.00357 | 0.00229 | 2691.092 | 1715.047 | 1461.166 | 0.996 | 0.905 |
| P218 | 27205418 | 217.532 | 0.00127 | 7e-04   | 1776.888 | 1189.723 | 957.726  | 0.975 | 0.843 |
| P219 | 24947426 | 277.045 | 0.00137 | 0.00207 | 1487.389 | 1191.14  | 1032.975 | 0.974 | 0.783 |
| P220 | 35542952 | 204.498 | 0.00139 | 5e-04   | 1999.764 | 1305.443 | 1231.979 | 0.992 | 0.896 |
| P221 | 32994698 | 256.235 | 0.00342 | 0.00143 | 1628.276 | 1268.973 | 1192.164 | 0.99  | 0.888 |
| P222 | 24404706 | 227.701 | 0.00219 | 0.02057 | 1653.608 | 1179.649 | 957.312  | 0.953 | 0.854 |
| P223 | 24302311 | 192.951 | 0.00809 | 0.02392 | 1623.682 | 1029.879 | 887.721  | 0.953 | 0.857 |
| P224 | 21777268 | 240.075 | 0.00387 | 0.00138 | 1231.83  | 975.07   | 762.659  | 0.954 | 0.901 |
| P225 | 29726324 | 237.327 | 0.00146 | 0.00054 | 1909.819 | 1291.87  | 1194.204 | 0.987 | 0.832 |
| P226 | 25622397 | 238.986 | 0.00195 | 0.00064 | 1666.665 | 1110.541 | 1000.832 | 0.98  | 0.843 |
| P227 | 51861241 | 251.195 | 0.00217 | 0.00046 | 2607.803 | 1454.93  | 1391.847 | 0.996 | 0.888 |
| P228 | 51218503 | 306.23  | 0.00303 | 0.00038 | 3212.45  | 1409.305 | 1237.472 | 0.991 | 0.763 |
| P229 | 1692972  | 233.668 | 0.00356 | 0.01982 | 781.196  | 912.444  | 815.904  | 0.963 | 0.868 |

|      |          |         |         |         |          |          |          |       |       |
|------|----------|---------|---------|---------|----------|----------|----------|-------|-------|
| P230 | 35123833 | 182.581 | 0.0026  | 0.00085 | 2294.893 | 1356.823 | 1157.227 | 0.984 | 0.841 |
| P231 | 45633849 | 256.051 | 0.00155 | 0.00229 | 2247.242 | 1577.453 | 1451.425 | 0.996 | 0.885 |
| P232 | 64768502 | 234.836 | 0.00349 | 0.01942 | 3060.905 | 1631.232 | 1476.751 | 0.995 | 0.87  |
| P233 | 53458980 | 225.9   | 0.00324 | 1e-06   | 2031.008 | 1338.845 | 1145.532 | 0.986 | 0.875 |
| P234 | 34862063 | 264.354 | 0.00271 | 0.00111 | 1924.118 | 1399.856 | 965.306  | 0.947 | 0.874 |
| P235 | 21842781 | 261.059 | 0.00154 | 0.00049 | 1422.85  | 992.009  | 795.31   | 0.938 | 0.847 |
| P236 | 28356856 | 231.31  | 0.00454 | 0.01408 | 1744.602 | 1215.803 | 1094.874 | 0.976 | 0.869 |
| P237 | 32666846 | 268.452 | 0.002   | 3e-04   | 2098.324 | 1325.79  | 1221.842 | 0.992 | 0.832 |
| P238 | 43401480 | 235.305 | 0.00414 | 0.02533 | 2286.38  | 1386.537 | 1252.102 | 0.984 | 0.869 |
| P239 | 37334056 | 233.7   | 0.00245 | 0.0084  | 1392.923 | 904.132  | 759.219  | 0.941 | 0.869 |
| P240 | 24744016 | 234.977 | 0.00246 | 0.00049 | 1660.155 | 1007.431 | 782.863  | 0.913 | 0.862 |
| P241 | 23195741 | 231.949 | 0.00537 | 0.02406 | 1556.965 | 1159.595 | 1041.369 | 0.974 | 0.868 |
| P242 | 17530298 | 200.123 | 0.00303 | 0.00033 | 1168.397 | 915.789  | 796.653  | 0.931 | 0.864 |
| P243 | 15518696 | 235.309 | 0.00354 | 0.02796 | 1279.524 | 1068.575 | 956.176  | 0.97  | 0.869 |
| P244 | 10230208 | 235.437 | 0.00404 | 0.01496 | 1089.291 | 1010.501 | 904.764  | 0.967 | 0.868 |
| P245 | 25620934 | 257.347 | 0.00165 | 0.00168 | 1432.968 | 1170.331 | 1089.736 | 0.991 | 0.902 |
| P246 | 19494560 | 257.865 | 0.00128 | 0.00164 | 1280.338 | 975.8    | 875.356  | 0.953 | 0.856 |
| P247 | 44251318 | 221.884 | 0.00202 | 0.00101 | 2889.695 | 1740.851 | 1668.993 | 0.997 | 0.836 |
| P248 | 30617677 | 256.294 | 0.00134 | 0.00046 | 2030.39  | 1446.119 | 1134.148 | 0.972 | 0.855 |
| P249 | 49715121 | 270.813 | 0.00274 | 0.00039 | 2428.718 | 1690.824 | 1629.27  | 0.996 | 0.882 |
| P250 | 23742420 | 233.402 | 0.00468 | 0.01292 | 1578.914 | 1164.766 | 1045.802 | 0.974 | 0.869 |
| P251 | 22867717 | 240.774 | 0.00293 | 0.00056 | 1284.554 | 952.286  | 774.383  | 0.969 | 0.899 |
| P252 | 4899235  | 212.8   | 0.00272 | 1e-06   | 1200.192 | 1005.461 | 921.271  | 0.99  | 0.76  |
| P253 | 21650556 | 254.545 | 0.00246 | 0.00047 | 1421.987 | 939.399  | 790.669  | 0.931 | 0.847 |
| P254 | 35639422 | 229.577 | 0.01499 | 0.02638 | 2338.737 | 1593.375 | 1498.849 | 0.995 | 0.856 |
| P255 | 35815912 | 234.136 | 0.00478 | 0.00994 | 2015.342 | 1299.895 | 1171.459 | 0.98  | 0.869 |
| P256 | 35833747 | 269.452 | 0.00316 | 0.00102 | 2336.48  | 1701.92  | 1595.39  | 0.993 | 0.842 |
| P257 | 29717240 | 232.073 | 0.00511 | 0.01205 | 1793.78  | 1232.161 | 1107.541 | 0.977 | 0.869 |
| P258 | 4847645  | 256.203 | 0.00178 | 0.00108 | 1875.957 | 1458.22  | 1165.477 | 0.997 | 0.778 |
| P259 | 31985141 | 242.062 | 0.00237 | 0.00216 | 1575.148 | 1140.564 | 1000.319 | 0.994 | 0.898 |
| P260 | 31419231 | 230.462 | 0.00535 | 0.00845 | 1854.954 | 1251.378 | 1126.617 | 0.978 | 0.869 |
| P261 | 25501552 | 236.375 | 0.00418 | 0.03145 | 1640.515 | 1184.764 | 1062.021 | 0.975 | 0.869 |
| P262 | 68995260 | 180.8   | 0.00266 | 1e-06   | 2583.244 | 1446.017 | 1248.051 | 0.94  | 0.86  |
| P263 | 38744900 | 231.267 | 0.00254 | 0.00064 | 2207.422 | 1549.645 | 1347.017 | 0.993 | 0.903 |
| P264 | 18012499 | 234.455 | 0.00305 | 0.00087 | 1166.159 | 899.124  | 774.419  | 0.947 | 0.847 |
| P265 | 43318694 | 267.462 | 0.00236 | 0.00245 | 2088.208 | 1482.537 | 1399.427 | 0.994 | 0.885 |
| P266 | 34380232 | 211.332 | 0.0028  | 0.00313 | 1672.402 | 1155.442 | 991.975  | 0.991 | 0.891 |
| P267 | 46516180 | 235.625 | 0.00237 | 0.00135 | 2269.752 | 1299.081 | 1230.553 | 0.993 | 0.884 |
| P268 | 30521478 | 218.827 | 0.00169 | 0.00152 | 1488.549 | 1055.986 | 1026.159 | 0.99  | 0.888 |
| P269 | 31252367 | 220.89  | 0.00249 | 0.01459 | 2137.151 | 1382.525 | 1202.393 | 0.984 | 0.865 |
| P270 | 47891358 | 273.48  | 0.00269 | 4e-04   | 2404.117 | 1525.335 | 1487.78  | 0.997 | 0.791 |
| P271 | 35136793 | 315.51  | 0.00207 | 0.00187 | 2209.669 | 1252.4   | 1212.855 | 0.995 | 0.819 |
| P272 | 36506273 | 257.567 | 0.00195 | 0.00102 | 2380.755 | 1655.718 | 1473.129 | 0.992 | 0.847 |
| P273 | 43602430 | 238.907 | 0.00271 | 0.00049 | 2502.193 | 1771.273 | 1727.138 | 0.997 | 0.909 |
| P274 | 61311266 | 240.754 | 0.00112 | 0.02271 | 2933.872 | 1592.039 | 1439.297 | 0.994 | 0.87  |
| P275 | 35906472 | 209.495 | 0.00295 | 0.00072 | 2386.417 | 1491.407 | 1330.572 | 0.99  | 0.849 |
| P276 | 40681243 | 211.626 | 0.00203 | 0.02787 | 2671.341 | 1394.627 | 1308.087 | 0.989 | 0.843 |
| P277 | 32481364 | 257.636 | 0.00129 | 0.00196 | 1552.092 | 1019.379 | 847.897  | 0.966 | 0.871 |
| P278 | 36752467 | 261.358 | 0.00269 | 0.00046 | 1816.585 | 1370.13  | 1326.748 | 0.994 | 0.886 |
| P279 | 23908438 | 211.808 | 0.0026  | 0.00138 | 1547.528 | 1013.148 | 887.333  | 0.974 | 0.842 |
| P280 | 21984717 | 240.534 | 0.00249 | 0.01222 | 1532.164 | 1038.648 | 976.53   | 0.973 | 0.882 |
| P281 | 32893525 | 271.547 | 0.0031  | 0.00098 | 2375.395 | 1508.135 | 1366.871 | 0.982 | 0.914 |
| P282 | 45998395 | 238.417 | 0.00289 | 0.01094 | 2381.604 | 1415.982 | 1277.412 | 0.986 | 0.869 |
| P283 | 30508517 | 254.423 | 0.00282 | 0.00068 | 1694.091 | 1287.87  | 772.129  | 0.95  | 0.887 |
| P284 | 31003451 | 232.75  | 0.00257 | 0.00041 | 1744.032 | 1366.68  | 1283.161 | 0.992 | 0.898 |
| P285 | 31994336 | 259.109 | 0.00213 | 0.01813 | 2090.699 | 1448.952 | 1297.092 | 0.99  | 0.85  |
| P286 | 21004196 | 245.291 | 0.0026  | 0.00101 | 1359.768 | 946.526  | 900.292  | 0.988 | 0.842 |
| P287 | 30103650 | 259.728 | 0.00139 | 0.00051 | 2035.566 | 1563.409 | 1346.024 | 0.993 | 0.881 |

|      |          |         |         |         |          |          |          |       |       |
|------|----------|---------|---------|---------|----------|----------|----------|-------|-------|
| P288 | 41334369 | 238.464 | 0.00282 | 0.00121 | 2335.899 | 1756.598 | 1573.485 | 0.997 | 0.898 |
| P289 | 31241370 | 265.953 | 0.00226 | 0.00085 | 2188.993 | 1443.496 | 1368.462 | 0.993 | 0.901 |
| P290 | 33725599 | 252.763 | 0.00264 | 0.01255 | 2269.583 | 1203.54  | 1122.124 | 0.991 | 0.832 |
| P291 | 31820434 | 227.147 | 0.00236 | 0.00292 | 1602.958 | 1202.795 | 1104.743 | 0.994 | 0.907 |
| P292 | 35715787 | 256.515 | 0.00269 | 0.00185 | 1780.732 | 1340.356 | 1269.936 | 0.991 | 0.893 |
| P293 | 36678166 | 211.421 | 0.00177 | 0.0023  | 2054.246 | 1492.576 | 1260.745 | 0.984 | 0.894 |
| P294 | 23937459 | 261.906 | 0.00182 | 0.01635 | 1562.941 | 1185.535 | 1111.465 | 0.985 | 0.855 |
| P295 | 484369   | 238.2   | 0.00337 | 1e-06   | 1990.864 | 1326.632 | 1193.01  | 0.99  | 0.875 |
| P296 | 16830459 | 220.444 | 0.0026  | 0.00056 | 1063.041 | 744.298  | 616.011  | 0.909 | 0.82  |
| P297 | 36550607 | 235.082 | 0.00389 | 0.02815 | 2039.152 | 1307.844 | 1178.315 | 0.981 | 0.869 |
| P298 | 40091080 | 236.687 | 0.00163 | 0.00267 | 2691.238 | 1829.939 | 1435.873 | 0.987 | 0.862 |
| P299 | 49527663 | 235.967 | 0.00384 | 0.02135 | 2508.344 | 1456.017 | 1313.608 | 0.987 | 0.869 |
| P300 | 26252031 | 240.206 | 0.00165 | 0.01728 | 1667.653 | 1192.323 | 1073.011 | 0.975 | 0.869 |
| P301 | 47480301 | 232.212 | 0.00499 | 0.01654 | 2436.512 | 1433.916 | 1294.671 | 0.986 | 0.87  |
| P302 | 28357209 | 186.183 | 0.00195 | 0.00064 | 1636.629 | 1127.793 | 932.35   | 0.975 | 0.923 |
| P303 | 41341226 | 221.14  | 0.00152 | 0.00184 | 2023.564 | 1428.541 | 1377.055 | 0.997 | 0.897 |
| P304 | 31354416 | 233.339 | 0.00461 | 0.00814 | 1851.392 | 1249.2   | 1124.58  | 0.978 | 0.869 |
| P305 | 40424847 | 268.253 | 0.00276 | 0.0018  | 2002.931 | 1472.923 | 1377.834 | 0.994 | 0.896 |
| P306 | 48674723 | 233.329 | 0.00468 | 0.01736 | 2477.389 | 1448.169 | 1305.977 | 0.987 | 0.869 |
| P307 | 53074469 | 241.397 | 0.0016  | 0.02186 | 2635.608 | 1496.265 | 1349.892 | 0.989 | 0.87  |
| P308 | 69196408 | 231.5   | 0.00282 | 1e-06   | 2478.998 | 1504.244 | 1520.737 | 0.998 | 0.862 |
| P309 | 33764049 | 255.467 | 0.00223 | 0.00055 | 1907.42  | 1390.742 | 1005.205 | 0.97  | 0.899 |
| P310 | 28390807 | 257.752 | 0.00198 | 0.00167 | 2055.617 | 1134.994 | 985.544  | 0.941 | 0.902 |
| P311 | 21667665 | 257.883 | 0.0039  | 0.01032 | 1500.485 | 1002.508 | 857.229  | 0.95  | 0.872 |
| P312 | 32599867 | 240.034 | 0.00274 | 0.00184 | 1626.618 | 1220.384 | 1117.269 | 0.993 | 0.897 |
| P313 | 55980542 | 226.389 | 0.00445 | 0.00193 | 3212.079 | 1952.987 | 1941.524 | 0.998 | 0.896 |
| P314 | 26503617 | 264.967 | 0.00325 | 0.00126 | 1313.95  | 1018.612 | 976.193  | 0.988 | 0.892 |
| P315 | 53495465 | 210.978 | 0.00132 | 0.00049 | 3049.417 | 1421.19  | 1412.835 | 0.997 | 0.891 |
| P316 | 49940299 | 247.177 | 0.00297 | 1e-06   | 1743.375 | 1290.168 | 1249.157 | 0.992 | 0.855 |
| P317 | 51087815 | 225.32  | 0.00257 | 0.00049 | 2893.314 | 2052.349 | 1993.468 | 0.997 | 0.9   |
| P318 | 29986525 | 192.77  | 0.00256 | 0.00057 | 1726.847 | 1048.82  | 953.669  | 0.987 | 0.902 |
| P319 | 24600322 | 208.408 | 0.00249 | 0.00062 | 1396.943 | 1024.3   | 851.306  | 0.978 | 0.903 |
| P320 | 31359482 | 223.137 | 0.00256 | 0.0173  | 2191.495 | 1448.689 | 1294.463 | 0.985 | 0.88  |
| P321 | 25626354 | 223.972 | 0.00316 | 0.00193 | 1684.373 | 1292.158 | 1000.78  | 0.963 | 0.847 |
| P322 | 39409576 | 232.267 | 0.00429 | 0.00997 | 2143.786 | 1340.758 | 1208.296 | 0.982 | 0.869 |
| P323 | 21880697 | 201.902 | 0.00256 | 0.01818 | 1565.809 | 1080.048 | 804.084  | 0.922 | 0.903 |
| P324 | 45300405 | 253.877 | 0.00204 | 0.0021  | 2243.695 | 1593.629 | 1505.922 | 0.997 | 0.892 |
| P325 | 35568357 | 230.135 | 0.00571 | 0.01739 | 2004.613 | 1298.255 | 1170.268 | 0.98  | 0.869 |
| P326 | 48610817 | 238.078 | 0.00239 | 0.00548 | 2474.28  | 1445.982 | 1304.228 | 0.987 | 0.869 |
| P327 | 27897835 | 229.242 | 0.00609 | 0.02032 | 1726.559 | 1209.918 | 1087.907 | 0.976 | 0.869 |
| P328 | 48399742 | 238.17  | 0.00251 | 0.00657 | 2468.033 | 1444.227 | 1304.268 | 0.987 | 0.869 |
| P329 | 33333160 | 215.402 | 0.00239 | 9e-04   | 1892.375 | 1100.652 | 1015.476 | 0.979 | 0.895 |
| P330 | 29408713 | 258.851 | 0.00246 | 0.00266 | 1935.627 | 1460.973 | 1235.022 | 0.984 | 0.853 |
| P331 | 20396469 | 207.194 | 0.00317 | 0.00109 | 1191.525 | 897.429  | 654.927  | 0.906 | 0.752 |
| P332 | 18541444 | 234.518 | 0.00748 | 1e-06   | 1276.17  | 1045.925 | 1027.32  | 0.986 | 0.879 |
| P333 | 25575924 | 236.644 | 0.00244 | 0.00186 | 1474.383 | 1012.677 | 914.99   | 0.983 | 0.911 |
| P334 | 30216260 | 214.778 | 0.0013  | 0.00522 | 1694.627 | 1266.832 | 1068.049 | 0.982 | 0.898 |
| P335 | 41026199 | 253.02  | 0.00168 | 0.00043 | 2719.662 | 1964.213 | 1869.76  | 0.996 | 0.852 |
| P336 | 29067748 | 236.112 | 0.00203 | 0.00233 | 1641.689 | 1210.332 | 910.428  | 0.979 | 0.896 |
| P337 | 27118619 | 272.301 | 0.00235 | 0.02999 | 1714.555 | 1241.56  | 1156.945 | 0.992 | 0.83  |
| P338 | 25427477 | 247.273 | 0.0031  | 0.00099 | 1651.243 | 1144.191 | 1066.427 | 0.979 | 0.84  |
| P339 | 15953061 | 233.57  | 0.00765 | 0.00052 | 1063.008 | 827.388  | 675.592  | 0.905 | 0.85  |
| P340 | 43088925 | 242.007 | 0.0018  | 0.00057 | 2419.388 | 1673.39  | 1606.593 | 0.996 | 0.893 |
| P341 | 41904530 | 243.601 | 0.00269 | 0.00034 | 2395.131 | 1685.5   | 1503.717 | 0.996 | 0.9   |
| P342 | 18031725 | 222.954 | 0.00382 | 0.01616 | 1229.068 | 869.902  | 692.936  | 0.928 | 0.864 |
| P343 | 25475092 | 250.034 | 0.00264 | 0.02122 | 1718.396 | 1205.879 | 1076.836 | 0.982 | 0.856 |
| P344 | 30473661 | 210.115 | 0.00241 | 0.0019  | 1737.416 | 1113.003 | 1095.847 | 0.988 | 0.903 |
| P345 | 72045768 | 193.1   | 0.00305 | 1e-06   | 2840.081 | 1633.292 | 1540.905 | 0.995 | 0.871 |

|      |          |         |         |         |          |          |          |       |       |
|------|----------|---------|---------|---------|----------|----------|----------|-------|-------|
| P346 | 35716451 | 198.919 | 0.00241 | 0.00179 | 2042.459 | 1155.014 | 1093.514 | 0.989 | 0.902 |
| P347 | 64859524 | 269.138 | 0.00132 | 0.00037 | 3573.416 | 1690.256 | 1619.949 | 0.997 | 0.868 |
| P348 | 24956733 | 233.496 | 0.00407 | 0.00752 | 1619.519 | 1178.456 | 1058.884 | 0.975 | 0.869 |
| P349 | 28645027 | 231.481 | 0.00182 | 0.02186 | 1893.839 | 1299.915 | 1190.47  | 0.981 | 0.853 |
| P350 | 27161121 | 226.167 | 0.00255 | 4e-04   | 1878.075 | 1451.131 | 1338.223 | 0.993 | 0.905 |
| P351 | 19754685 | 235.377 | 0.00303 | 0.00047 | 1310.359 | 1051.856 | 924.083  | 0.959 | 0.861 |
| P352 | 24354852 | 208.372 | 0.00139 | 0.00067 | 1607.442 | 1025.131 | 824.187  | 0.935 | 0.851 |
| P353 | 28445148 | 236.59  | 0.00292 | 0.01504 | 1747.184 | 1216.984 | 1093.549 | 0.976 | 0.869 |
| P354 | 23000887 | 256.169 | 0.00382 | 0.01714 | 1581.406 | 1122.159 | 1030.757 | 0.983 | 0.873 |
| P355 | 32577698 | 212.865 | 0.00257 | 0.00038 | 1855.576 | 1327.157 | 1183.499 | 0.99  | 0.902 |
| P356 | 50614076 | 246.056 | 0.00133 | 0.00052 | 3312.944 | 2079.732 | 1738.588 | 0.992 | 0.842 |
| P357 | 35530711 | 236.737 | 0.00308 | 0.02042 | 2001.576 | 1296.472 | 1165.779 | 0.98  | 0.869 |
| P358 | 28454776 | 246.845 | 0.00152 | 0.01306 | 1876.298 | 1290.353 | 976.958  | 0.947 | 0.857 |
| P359 | 37014734 | 227.477 | 0.00174 | 0.00086 | 2531.913 | 1526.218 | 1393.118 | 0.98  | 0.87  |
| P360 | 32144179 | 233.416 | 0.00293 | 0.00028 | 2293.403 | 1598.277 | 1212.861 | 0.977 | 0.91  |
| P361 | 19178274 | 292.482 | 0.00192 | 0.00062 | 1202.596 | 927.216  | 812.948  | 0.94  | 0.82  |
| P362 | 24918597 | 233.174 | 0.00301 | 8e-04   | 1704.14  | 1345.253 | 1195.407 | 0.991 | 0.896 |
| P363 | 39991513 | 234.578 | 0.00399 | 0.00614 | 2164.396 | 1348.509 | 1215.265 | 0.982 | 0.869 |
| P364 | 62233370 | 236.723 | 0.00297 | 1e-06   | 2212.419 | 1432.163 | 1373.711 | 0.996 | 0.861 |
| P365 | 27328194 | 241.116 | 0.00809 | 0.01358 | 1799.616 | 1093.804 | 852.447  | 0.953 | 0.84  |
| P366 | 56406093 | 246.568 | 0.00209 | 0.00305 | 4098.556 | 1979.588 | 1627.562 | 0.99  | 0.915 |
| P367 | 22915984 | 222.284 | 0.00189 | 0.00233 | 1302.909 | 937.181  | 903.485  | 0.984 | 0.902 |
| P368 | 21902799 | 255.686 | 0.00154 | 0.00048 | 1443.257 | 1041.869 | 885.38   | 0.961 | 0.857 |
| P369 | 33998550 | 273.92  | 0.00153 | 0.00209 | 1624.032 | 1215.827 | 1176.516 | 0.99  | 0.882 |
| P370 | 41524942 | 239.795 | 0.00223 | 0.01005 | 2220.281 | 1366.431 | 1232.942 | 0.983 | 0.869 |
| P371 | 54737548 | 231.745 | 0.00502 | 0.00449 | 2698.297 | 1517.149 | 1371.011 | 0.99  | 0.87  |
| P372 | 21729826 | 231.514 | 0.00499 | 0.01113 | 1504.466 | 1142.771 | 1027.01  | 0.973 | 0.869 |
| P373 | 29932416 | 212.884 | 0.00273 | 0.00146 | 1624.377 | 988.993  | 967.719  | 0.992 | 0.842 |
| P374 | 39983508 | 259.089 | 0.00184 | 0.00177 | 1947.961 | 1442.476 | 1347.174 | 0.994 | 0.878 |
| P375 | 46160376 | 231.62  | 0.00141 | 0.00085 | 2632.043 | 1727.18  | 1519.133 | 0.992 | 0.894 |
| P376 | 46449908 | 247.8   | 0.00325 | 0.01195 | 1277.171 | 877.015  | 786.958  | 0.971 | 0.834 |
| P377 | 31953287 | 237.487 | 0.00235 | 0.00047 | 2106.038 | 1518.356 | 1208.989 | 0.98  | 0.848 |
| P378 | 47817084 | 168.43  | 0.00748 | 0.00685 | 3337.438 | 1637.468 | 1410.659 | 0.993 | 0.873 |
| P379 | 48067419 | 227.484 | 0.00652 | 0.01417 | 2457.599 | 1439.244 | 1298.446 | 0.987 | 0.869 |
| P380 | 34536438 | 254.061 | 0.00176 | 0.00043 | 1941.279 | 1344.09  | 1306.04  | 0.996 | 0.897 |
| P381 | 34918186 | 238.403 | 0.00281 | 8e-04   | 2295.873 | 1596.69  | 1281.157 | 0.986 | 0.849 |
| P382 | 39806843 | 248.7   | 0.00208 | 0.00368 | 1942.74  | 1481.892 | 1269.48  | 0.989 | 0.88  |
| P383 | 36630783 | 218.487 | 0.00293 | 0.00042 | 2041.03  | 1361.233 | 1311.047 | 0.996 | 0.886 |
| P384 | 20333009 | 248.472 | 0.00639 | 0.00856 | 1381.083 | 1101.724 | 1073.182 | 0.984 | 0.871 |
| P385 | 17485056 | 203.872 | 0.00154 | 0.00133 | 1123.549 | 681.437  | 633.233  | 0.922 | 0.835 |
| P386 | 33994861 | 231.321 | 0.00183 | 0.00114 | 1938.339 | 1387.699 | 1382.241 | 0.995 | 0.907 |
| P387 | 42935668 | 211     | 0.00333 | 1e-06   | 1855.152 | 1398.257 | 1230.716 | 0.985 | 0.903 |
| P388 | 35680657 | 237.174 | 0.00299 | 0.00689 | 2007.799 | 1299.205 | 1169.061 | 0.98  | 0.869 |
| P389 | 36438427 | 234.924 | 0.00402 | 0.01491 | 2035.844 | 1307.401 | 1177.779 | 0.981 | 0.869 |
| P390 | 33431149 | 258.507 | 0.00324 | 0.00077 | 2160.714 | 1643.069 | 1591.582 | 0.996 | 0.85  |
| P391 | 13884851 | 223.024 | 0.0051  | 1e-06   | 966.644  | 792.827  | 700.176  | 0.949 | 0.888 |
| P392 | 42032326 | 216.799 | 0.00244 | 0.00111 | 2104.124 | 1352.575 | 1289.615 | 0.995 | 0.894 |
| P393 | 36476789 | 233.85  | 0.00177 | 0.00175 | 2052.084 | 1404.86  | 1343.51  | 0.993 | 0.891 |
| P394 | 34910327 | 256.872 | 0.00267 | 0.00044 | 1947.072 | 1287.624 | 1184.789 | 0.99  | 0.884 |
| P395 | 38816999 | 240.5   | 0.00361 | 0.00219 | 1888.424 | 1350.932 | 1309.601 | 0.997 | 0.874 |
| P396 | 16748292 | 233.844 | 0.00403 | 0.02324 | 1323.074 | 1085.034 | 974.96   | 0.971 | 0.869 |
| P397 | 48782309 | 238.41  | 0.00243 | 0.01066 | 2482.968 | 1448.429 | 1306.285 | 0.987 | 0.869 |
| P398 | 51816553 | 236.238 | 0.00286 | 0.02348 | 2592.775 | 1483.369 | 1340.665 | 0.989 | 0.87  |
| P399 | 32641375 | 232.818 | 0.00483 | 0.02482 | 1899.848 | 1265.061 | 1137.965 | 0.979 | 0.869 |
| P400 | 53222285 | 210.745 | 0.00203 | 0.02171 | 3488.085 | 1674.867 | 1571.775 | 0.995 | 0.83  |
| P401 | 24984546 | 197.358 | 0.00333 | 0.00082 | 1398.073 | 965.161  | 814.578  | 0.982 | 0.897 |
| P402 | 42338326 | 229.062 | 0.00204 | 0.00257 | 2084.063 | 1507.519 | 1082.709 | 0.986 | 0.882 |
| P403 | 58357677 | 273.848 | 0.00241 | 0.00079 | 2796.365 | 1831.381 | 1780.74  | 0.998 | 0.882 |

|      |          |         |         |         |          |          |          |       |       |
|------|----------|---------|---------|---------|----------|----------|----------|-------|-------|
| P404 | 37564552 | 235.827 | 0.0026  | 0.00076 | 2472.03  | 1607.525 | 1553.013 | 0.998 | 0.848 |
| P405 | 20739894 | 221.816 | 0.00329 | 0.01876 | 1345.737 | 990.345  | 770.26   | 0.906 | 0.848 |
| P406 | 23032725 | 236.299 | 0.00219 | 0.01665 | 1638.712 | 1074.028 | 915.693  | 0.959 | 0.889 |
| P407 | 33619295 | 257.828 | 0.00297 | 0.00118 | 2199.61  | 1470.556 | 1342.626 | 0.991 | 0.843 |
| P408 | 18983759 | 237.194 | 0.00319 | 0.01996 | 1405.99  | 1111.148 | 997.732  | 0.972 | 0.869 |
| P409 | 29533662 | 254.411 | 0.00318 | 0.00076 | 1853.119 | 1383.725 | 1316.322 | 0.996 | 0.843 |
| P410 | 25593701 | 279.372 | 0.00145 | 0.00043 | 1658.125 | 1159.107 | 893.169  | 0.937 | 0.845 |
| P411 | 54977256 | 265.428 | 0.00256 | 0.00145 | 2634.001 | 1796.869 | 1766.531 | 0.997 | 0.876 |
| P412 | 51160316 | 234.034 | 0.00407 | 0.00698 | 2566.207 | 1475.23  | 1331.481 | 0.988 | 0.869 |
| P413 | 68768284 | 220.2   | 0.00327 | 1e-06   | 2899.111 | 1762.77  | 1759.643 | 0.998 | 0.887 |
| P414 | 34637511 | 249.603 | 0.0045  | 0.00156 | 1949.533 | 1471.839 | 1441.965 | 0.997 | 0.895 |
| P415 | 53661669 | 245.523 | 0.00414 | 0.00037 | 3032.829 | 2195.504 | 2181.098 | 0.998 | 0.9   |
| P416 | 48174498 | 235.325 | 0.00436 | 0.00925 | 2459.465 | 1442.102 | 1301.992 | 0.987 | 0.87  |
| P417 | 28445215 | 258.443 | 0.00349 | 0.00215 | 1359.942 | 963.042  | 944.217  | 0.99  | 0.868 |
| P418 | 41184033 | 235.102 | 0.00499 | 0.00037 | 2029.937 | 1507.055 | 1460.162 | 0.994 | 0.883 |
| P419 | 6531322  | 199.6   | 0.00272 | 1e-06   | 1663.258 | 1377.377 | 1212.932 | 0.995 | 0.779 |
| P420 | 19325180 | 231.786 | 0.00492 | 0.02621 | 1416.283 | 1115.494 | 1001.835 | 0.972 | 0.869 |
| P421 | 33362723 | 255.449 | 0.00495 | 0.16045 | 1138.927 | 798.378  | 718.572  | 0.921 | 0.847 |
| P422 | 6293518  | 200     | 0.00333 | 1e-06   | 1587.769 | 1266.202 | 1213.108 | 0.994 | 0.767 |
| P423 | 40681510 | 238.145 | 0.00202 | 0.00281 | 2021.786 | 1212.052 | 1022.791 | 0.985 | 0.899 |
| P424 | 34560373 | 266.715 | 0.00342 | 0.0014  | 1693.219 | 1320.472 | 1231.415 | 0.991 | 0.882 |
| P425 | 86869093 | 214.713 | 0.0013  | 0.00605 | 4396.67  | 1209.637 | 1192.057 | 0.99  | 0.864 |
| P426 | 54236220 | 238.191 | 0.00279 | 0.00113 | 3028.433 | 1496.915 | 1366.921 | 0.992 | 0.866 |
| P427 | 32487645 | 244.768 | 0.00131 | 0.0019  | 1563.149 | 1171.13  | 984.815  | 0.984 | 0.865 |
| P428 | 44028408 | 224.357 | 0.00138 | 0.00027 | 2504.289 | 1765.151 | 1727.571 | 0.997 | 0.905 |
| P429 | 43735632 | 247.043 | 0.00279 | 0.00225 | 2428.649 | 1245.656 | 1038.532 | 0.981 | 0.866 |
| P430 | 26818122 | 231.194 | 0.00195 | 0.02538 | 1776.283 | 1251.994 | 937.171  | 0.963 | 0.853 |
| P431 | 28320145 | 171.241 | 0.00161 | 0.00878 | 1412.86  | 824.113  | 784.361  | 0.966 | 0.771 |
| P432 | 22212470 | 244.361 | 0.00301 | 0.01493 | 1545.285 | 1100.047 | 977.485  | 0.974 | 0.88  |
| P433 | 44634276 | 236.068 | 0.00324 | 0.02554 | 2333.13  | 1401.879 | 1265.415 | 0.985 | 0.869 |
| P434 | 43879400 | 232.837 | 0.00284 | 0.00198 | 2176.843 | 1541.362 | 1374.531 | 0.993 | 0.885 |
| P435 | 17235719 | 232.175 | 0.00303 | 0.00034 | 1152.473 | 921.096  | 873.711  | 0.963 | 0.864 |
| P436 | 6420717  | 234.1   | 0.00357 | 0.1176  | 1543.92  | 1274.712 | 1257.107 | 0.999 | 0.756 |
| P437 | 48841339 | 202.6   | 0.00554 | 1e-06   | 1801.279 | 1165.593 | 1119.81  | 0.991 | 0.871 |
| P438 | 29115657 | 257.977 | 0.00198 | 0.00152 | 2103.145 | 1198.386 | 996.141  | 0.944 | 0.902 |
| P439 | 68631941 | 202.9   | 0.00372 | 0.10127 | 2573.658 | 1422.238 | 1141.794 | 0.976 | 0.853 |
| P440 | 42294671 | 244.586 | 0.00287 | 0.00044 | 2084.141 | 1368.072 | 1266.602 | 0.992 | 0.879 |
| P441 | 26369010 | 247.323 | 0.00127 | 0.00081 | 1730.105 | 1210.565 | 1144.996 | 0.985 | 0.849 |
| P442 | 20910421 | 278.999 | 0.00159 | 4e-04   | 1151.093 | 989.551  | 961.074  | 0.985 | 0.891 |
| P443 | 46732294 | 234.277 | 0.00306 | 4e-04   | 2345.662 | 1490.369 | 1457.068 | 0.997 | 0.888 |
| P444 | 32854439 | 226.898 | 0.00271 | 0.00237 | 1905.7   | 1345.581 | 1029.667 | 0.977 | 0.912 |
| P445 | 46680675 | 226.504 | 0.00317 | 0.00049 | 3107.585 | 1994.446 | 1508.858 | 0.991 | 0.848 |
| P446 | 18038940 | 218.822 | 0.00172 | 0.00104 | 1173.599 | 912.214  | 581.251  | 0.904 | 0.858 |
| P447 | 49805109 | 248.055 | 0.00138 | 0.00057 | 3548.067 | 2197.849 | 1884.046 | 0.994 | 0.91  |
| P448 | 20495009 | 259.589 | 0.00148 | 0.00127 | 994.806  | 722.036  | 680.273  | 0.93  | 0.884 |
| P449 | 41630422 | 256.857 | 0.00224 | 0.00209 | 1988.799 | 1417.674 | 1066.667 | 0.977 | 0.854 |
| P450 | 40648167 | 327.581 | 0.00215 | 0.03015 | 2558.38  | 1140.63  | 1108.328 | 0.994 | 0.794 |
| P451 | 22160205 | 240.954 | 0.00487 | 1e-06   | 1512.855 | 1225.874 | 1151.139 | 0.993 | 0.873 |
| P452 | 24817675 | 235.375 | 0.00327 | 0.00161 | 1203.444 | 895.244  | 794.266  | 0.978 | 0.893 |
| P453 | 27483032 | 235.47  | 0.00452 | 0.01319 | 1712.353 | 1206.701 | 1085.704 | 0.976 | 0.869 |
| P454 | 29875808 | 209.815 | 0.00154 | 0.02204 | 1976.166 | 1105.704 | 1062.839 | 0.993 | 0.84  |
| P455 | 29305723 | 254.786 | 0.00204 | 0.0014  | 2073.726 | 1321.753 | 1195.029 | 0.984 | 0.907 |
| P456 | 52076324 | 259.646 | 0.00146 | 0.00049 | 2922.088 | 2109.028 | 1936.236 | 0.998 | 0.899 |
| P457 | 53307795 | 255.866 | 0.00319 | 0.00063 | 2926.121 | 1733.321 | 1606.233 | 0.997 | 0.869 |
| P458 | 40195296 | 245.388 | 0.00303 | 0.00053 | 2282.354 | 1740.607 | 1107.64  | 0.981 | 0.9   |
| P459 | 49560787 | 243.542 | 0.00259 | 1e-06   | 1732.188 | 977.134  | 941.693  | 0.979 | 0.849 |
| P460 | 34657172 | 235.474 | 0.00379 | 0.0121  | 1970.55  | 1287.085 | 1157.724 | 0.98  | 0.869 |
| P461 | 22679855 | 253.602 | 0.00246 | 0.00037 | 1463.939 | 1006.887 | 929.014  | 0.963 | 0.835 |



|      |          |         |         |         |          |          |          |       |       |
|------|----------|---------|---------|---------|----------|----------|----------|-------|-------|
| P462 | 29272066 | 233.936 | 0.00233 | 0.00247 | 1613.438 | 1207.598 | 1111.652 | 0.99  | 0.879 |
| P463 | 2493384  | 231.285 | 0.00621 | 0.02334 | 807.538  | 922.297  | 822.963  | 0.963 | 0.868 |
| P464 | 30305770 | 316.704 | 0.00289 | 0.00253 | 1398.094 | 1012.95  | 969.665  | 0.985 | 0.853 |
| P465 | 22434736 | 232.588 | 0.00475 | 0.01176 | 1530.785 | 1147.978 | 1031.292 | 0.973 | 0.869 |
| P466 | 15980031 | 255.406 | 0.00249 | 0.01246 | 1125.963 | 794.812  | 705.173  | 0.92  | 0.89  |
| P467 | 25429152 | 265.68  | 0.00293 | 0.00084 | 1813.463 | 1224.19  | 1140.239 | 0.985 | 0.912 |
| P468 | 53575819 | 242.53  | 0.00257 | 0.00812 | 2995.323 | 1511.088 | 1399.811 | 0.996 | 0.864 |
| P469 | 56796634 | 190.8   | 0.00338 | 0.00884 | 1979.255 | 1190.923 | 1067.493 | 0.931 | 0.89  |
| P470 | 32880918 | 248.4   | 0.00204 | 0.00184 | 2354.609 | 1411.671 | 1294.258 | 0.986 | 0.914 |
| P471 | 52994435 | 232.581 | 0.00487 | 0.01382 | 2634.968 | 1494.791 | 1350.062 | 0.989 | 0.87  |
| P472 | 27545092 | 229.622 | 0.00372 | 0.00035 | 1558.163 | 1226.881 | 1160.507 | 0.992 | 0.9   |
| P473 | 28188693 | 298.567 | 0.00162 | 0.00256 | 2000.572 | 1305.78  | 1204.06  | 0.971 | 0.905 |
| P474 | 37861814 | 239.935 | 0.0017  | 5e-04   | 2159.179 | 1494.827 | 1415.086 | 0.993 | 0.908 |
| P475 | 37308544 | 221.686 | 0.00198 | 0.00139 | 2035.419 | 883.661  | 840.653  | 0.993 | 0.817 |
| P476 | 47723274 | 166.664 | 0.00207 | 0.00217 | 2965.843 | 1354.148 | 1141.548 | 0.98  | 0.788 |
| P477 | 24155822 | 240.868 | 0.00293 | 3e-04   | 1734.567 | 1240.089 | 1160.742 | 0.983 | 0.919 |
| P478 | 40235598 | 227.802 | 0.00253 | 0.00183 | 2001.303 | 1403.006 | 1383.226 | 0.995 | 0.903 |
| P479 | 52217601 | 232.121 | 0.00464 | 0.0055  | 2605.606 | 1488.607 | 1342.661 | 0.989 | 0.869 |
| P480 | 30726284 | 263.583 | 0.00335 | 0.02162 | 1997.034 | 1360.247 | 1035.153 | 0.972 | 0.838 |
| P481 | 16185426 | 235.63  | 0.00346 | 1e-06   | 1104.446 | 963.451  | 899.21   | 0.981 | 0.88  |
| P482 | 40517502 | 257.586 | 0.00162 | 0.00057 | 2921.784 | 1841.788 | 1722.181 | 0.989 | 0.912 |
| P483 | 38150478 | 212.8   | 0.00288 | 1e-06   | 1628.777 | 1221.416 | 1165.447 | 0.988 | 0.896 |
| P484 | 55657065 | 210.2   | 0.00267 | 0.00685 | 2040.464 | 1232.614 | 1218.312 | 0.99  | 0.872 |
| P485 | 57503419 | 238.18  | 0.00246 | 0.00931 | 2796.577 | 1547.298 | 1399.127 | 0.992 | 0.87  |
| P486 | 53504471 | 242.063 | 0.00168 | 0.00059 | 2509.334 | 1390.138 | 1417.194 | 0.993 | 0.839 |
| P487 | 32897184 | 185.406 | 0.00139 | 0.00232 | 2200.463 | 1261.445 | 1011.354 | 0.961 | 0.852 |
| P488 | 21643016 | 263.41  | 0.00294 | 0.03102 | 1323.162 | 934.798  | 870.981  | 0.971 | 0.79  |
| P489 | 24983024 | 248.049 | 0.00295 | 0.01116 | 1717.863 | 1087.228 | 968.492  | 0.965 | 0.861 |
| P490 | 27080161 | 218.654 | 0.00325 | 0.00044 | 1392.127 | 1012.433 | 911.021  | 0.975 | 0.918 |
| P491 | 27547568 | 273.948 | 0.00182 | 0.00027 | 1806.25  | 1317.837 | 1148.349 | 0.978 | 0.851 |
| P492 | 3567299  | 217.032 | 0.00565 | 1e-06   | 1322.955 | 1137.853 | 1038.392 | 0.982 | 0.756 |
| P493 | 19002146 | 238.97  | 0.00467 | 1e-06   | 1313.765 | 1070.096 | 980.348  | 0.976 | 0.887 |
| P494 | 28062095 | 265.36  | 0.00295 | 0.01079 | 1937.629 | 1155.051 | 1136.316 | 0.986 | 0.868 |
| P495 | 15781163 | 228.628 | 0.00559 | 0.01329 | 1291.028 | 1076.429 | 964.968  | 0.97  | 0.868 |
| P496 | 26218618 | 270.502 | 0.00148 | 0.00144 | 1261.869 | 865.867  | 816.581  | 0.975 | 0.876 |
| P497 | 30505411 | 242.686 | 0.00317 | 0.00058 | 1987.661 | 1406.298 | 1029.9   | 0.965 | 0.843 |
| P498 | 44882027 | 246.816 | 0.00209 | 0.00115 | 2420.216 | 1615.422 | 1604.432 | 0.997 | 0.848 |
| P499 | 35569600 | 285.375 | 0.003   | 0.0022  | 1725.644 | 1320.993 | 1242.306 | 0.994 | 0.878 |
| P500 | 36938061 | 245.583 | 0.00275 | 0.0019  | 1842.548 | 1333.493 | 1079.432 | 0.983 | 0.898 |
| P501 | 23153241 | 235.486 | 0.00433 | 0.01947 | 1554.879 | 1158.081 | 1039.884 | 0.974 | 0.868 |
| P502 | 25928624 | 253.857 | 0.00138 | 0.0019  | 1631.568 | 1146.558 | 947.673  | 0.961 | 0.813 |
| P503 | 23223132 | 291.569 | 0.00256 | 0.02069 | 1562.678 | 1195.253 | 1097.986 | 0.967 | 0.857 |
| P504 | 30808382 | 235.197 | 0.00252 | 0.00189 | 2183.908 | 1347.521 | 1057.838 | 0.971 | 0.906 |
| P505 | 33832990 | 213.748 | 0.00239 | 0.00188 | 1920.946 | 1116.429 | 1106.186 | 0.991 | 0.898 |
| P506 | 38241750 | 238.365 | 0.0024  | 0.0143  | 2101.614 | 1328.556 | 1197.716 | 0.982 | 0.869 |
| P507 | 67652586 | 213.918 | 0.00226 | 0.01516 | 5072.089 | 1229.675 | 816.068  | 0.902 | 0.896 |
| P508 | 32927794 | 258.343 | 0.00276 | 0.00064 | 1618.598 | 1189.937 | 1039.571 | 0.986 | 0.886 |
| P509 | 45628182 | 237.289 | 0.00245 | 0.00728 | 2366.889 | 1412.22  | 1275.142 | 0.985 | 0.869 |
| P510 | 32042078 | 263.281 | 0.00134 | 0.00038 | 2062.083 | 1556.132 | 1332.242 | 0.985 | 0.84  |
| P511 | 26040848 | 215.095 | 0.00201 | 0.00067 | 1263.984 | 881.4    | 735.47   | 0.96  | 0.897 |
| P512 | 92492018 | 256.164 | 0.00153 | 0.00138 | 4544.657 | 703.658  | 704.008  | 0.994 | 0.787 |
| P513 | 32267411 | 228.318 | 0.00169 | 0.00156 | 1562.688 | 1002.414 | 975.151  | 0.992 | 0.876 |
| P514 | 52349085 | 223.5   | 0.00292 | 1e-06   | 1986.899 | 1230.976 | 1213.376 | 0.994 | 0.872 |
| P515 | 16106322 | 221.105 | 0.0051  | 1e-06   | 1123.682 | 912.989  | 814.463  | 0.958 | 0.89  |
| P516 | 41441585 | 281.436 | 0.00182 | 0.00075 | 2302.153 | 1642.354 | 1613.306 | 0.996 | 0.89  |
| P517 | 40554150 | 233.648 | 0.00384 | 0.02084 | 2182.242 | 1354.175 | 1220.061 | 0.983 | 0.869 |
| P518 | 89860559 | 210.719 | 0.00231 | 0.00406 | 5180.231 | 767.501  | 765.462  | 0.996 | 0.832 |
| P519 | 20075718 | 230.765 | 0.00136 | 5e-04   | 1114.307 | 829.552  | 707.243  | 0.962 | 0.894 |

|      |          |         |         |         |          |          |          |       |       |
|------|----------|---------|---------|---------|----------|----------|----------|-------|-------|
| P520 | 23706355 | 243.562 | 0.00443 | 0.00166 | 1346.536 | 932.819  | 910.9    | 0.98  | 0.9   |
| P521 | 44107956 | 224.907 | 0.00248 | 0.00047 | 2145.049 | 1400.404 | 1036.09  | 0.983 | 0.888 |
| P522 | 44507971 | 251.151 | 0.00269 | 0.00049 | 2222.959 | 1557.941 | 1463.619 | 0.995 | 0.896 |
| P523 | 31000113 | 209.3   | 0.00275 | 0.07311 | 1154.351 | 854.905  | 761.41   | 0.945 | 0.861 |
| P524 | 23567067 | 231.027 | 0.00231 | 0.01623 | 1554.894 | 1109.306 | 1063.132 | 0.984 | 0.861 |
| P525 | 52929247 | 205.157 | 0.0022  | 0.00072 | 3031.598 | 1857.34  | 1530.99  | 0.996 | 0.906 |
| P526 | 44920058 | 238.08  | 0.00269 | 0.01474 | 2343.2   | 1405.478 | 1267.378 | 0.985 | 0.869 |
| P527 | 26150267 | 180.75  | 0.00699 | 0.00039 | 1792.956 | 1240.254 | 1048.933 | 0.973 | 0.87  |
| P528 | 20299722 | 232.964 | 0.00434 | 0.01382 | 1451.603 | 1125.377 | 1009.996 | 0.972 | 0.868 |
| P529 | 26805060 | 231.906 | 0.00463 | 0.03066 | 1687.995 | 1200.054 | 1077.262 | 0.976 | 0.869 |
| P530 | 29706092 | 238.548 | 0.00357 | 0.00121 | 1661.122 | 1206.886 | 1062.851 | 0.99  | 0.891 |
| P531 | 34525886 | 233.664 | 0.00443 | 0.02078 | 1967.866 | 1287.909 | 1161.716 | 0.98  | 0.869 |
| P532 | 31228853 | 224.082 | 0.00209 | 0.00048 | 1782.276 | 1266.055 | 1232.769 | 0.996 | 0.905 |
| P533 | 27823323 | 225.139 | 0.0021  | 0.00226 | 1593.1   | 1050.113 | 856.019  | 0.968 | 0.902 |
| P534 | 51111613 | 235.8   | 0.00377 | 1e-06   | 1823.935 | 1162.755 | 1123.646 | 0.94  | 0.87  |
| P535 | 23840912 | 259.035 | 0.00249 | 0.0172  | 1639.878 | 1128.639 | 968.27   | 0.968 | 0.872 |
| P536 | 48388938 | 228.97  | 0.00637 | 0.00751 | 2468.38  | 1445.215 | 1303.138 | 0.987 | 0.869 |
| P537 | 26996431 | 275.73  | 0.00125 | 6e-04   | 1785.13  | 1328.009 | 1072.331 | 0.986 | 0.871 |
| P538 | 49935762 | 224.4   | 0.00239 | 0.00218 | 2207.219 | 924.473  | 922.553  | 0.981 | 0.75  |
| P539 | 39879163 | 273.155 | 0.00139 | 0.00064 | 2198.811 | 1519.348 | 1450.721 | 0.995 | 0.883 |
| P540 | 41543894 | 233.984 | 0.00419 | 0.00956 | 2220.296 | 1366.921 | 1232.696 | 0.983 | 0.869 |
| P541 | 58564531 | 241.144 | 0.00133 | 0.00465 | 2834.835 | 1558.049 | 1409.067 | 0.992 | 0.87  |
| P542 | 40368520 | 240.393 | 0.00156 | 0.01579 | 2178.293 | 1353.936 | 1220.291 | 0.983 | 0.869 |
| P543 | 36375915 | 204.5   | 0.00375 | 0.10164 | 1420.652 | 1027.607 | 928.909  | 0.973 | 0.887 |
| P544 | 62593910 | 240.271 | 0.00274 | 0.00083 | 3094.88  | 1713.833 | 1723.999 | 0.998 | 0.88  |
| P545 | 28340139 | 255.549 | 0.00164 | 0.00234 | 1394.689 | 1037.116 | 955.001  | 0.974 | 0.903 |
| P546 | 44606464 | 230.868 | 0.00547 | 0.01403 | 2331.016 | 1400.498 | 1263.47  | 0.985 | 0.87  |
| P547 | 72439929 | 265.615 | 0.00176 | 0.01262 | 4042.378 | 903.833  | 900.023  | 0.994 | 0.823 |
| P548 | 31813811 | 210.496 | 0.00345 | 0.00066 | 1833.516 | 1329.646 | 1219.02  | 0.991 | 0.918 |
| P549 | 34179750 | 239.48  | 0.00273 | 0.0027  | 1897.506 | 1224.479 | 1069.035 | 0.983 | 0.88  |
| P550 | 49433387 | 242.903 | 0.00574 | 1e-06   | 1662.143 | 1177.185 | 1119.592 | 0.985 | 0.826 |
| P551 | 45645966 | 240.249 | 0.00279 | 0.00096 | 2545.675 | 1286.249 | 1046.506 | 0.974 | 0.868 |
| P552 | 23789745 | 228.3   | 0.00565 | 0.00538 | 1645.996 | 1258.496 | 1222.517 | 0.991 | 0.883 |
| P553 | 68931762 | 245.742 | 0.00151 | 0.00185 | 3372.689 | 1979.7   | 1959.346 | 0.998 | 0.889 |
| P554 | 47481483 | 262.582 | 0.002   | 0.0028  | 3072.057 | 1931.773 | 1887.047 | 0.996 | 0.836 |
| P555 | 24718614 | 219.768 | 0.00809 | 0.0141  | 1621.235 | 1063.235 | 911.689  | 0.954 | 0.841 |
| P556 | 50839275 | 235.559 | 0.00361 | 0.00042 | 2587.859 | 1764.723 | 1665.78  | 0.997 | 0.908 |
| P557 | 65951212 | 229.1   | 0.00605 | 1e-06   | 2356.259 | 1412.695 | 1373.768 | 0.997 | 0.867 |
| P558 | 44580033 | 220.116 | 0.00232 | 0.00429 | 2091.427 | 1283.799 | 826.078  | 0.944 | 0.887 |
| P559 | 49641686 | 235.885 | 0.00313 | 0.0114  | 2512.593 | 1459.977 | 1317.862 | 0.988 | 0.869 |
| P560 | 46530004 | 239.102 | 0.00236 | 0.00623 | 2400.205 | 1420.711 | 1280.392 | 0.986 | 0.869 |
| P561 | 28996231 | 244.739 | 0.00235 | 0.03043 | 1875.149 | 1344.485 | 1020.901 | 0.97  | 0.84  |
| P562 | 26700691 | 230.773 | 0.00256 | 0.01512 | 1862.244 | 1263.092 | 1104.171 | 0.963 | 0.884 |
| P563 | 27422772 | 210.223 | 0.00303 | 0.00041 | 1683.249 | 1269.142 | 1215.863 | 0.989 | 0.79  |
| P564 | 17796008 | 230.48  | 0.00295 | 0.01339 | 1232.329 | 834.984  | 682.12   | 0.921 | 0.874 |
| P565 | 30863899 | 259.089 | 0.00293 | 0.00195 | 2170.193 | 1554.501 | 1435.846 | 0.994 | 0.905 |
| P566 | 42463082 | 233.259 | 0.0045  | 0.00626 | 2254.09  | 1375.784 | 1241.587 | 0.984 | 0.869 |
| P567 | 23464208 | 244.697 | 0.00324 | 0.01758 | 1658.37  | 1113.001 | 1078.944 | 0.982 | 0.887 |
| P568 | 34962287 | 231.518 | 0.0021  | 0.00277 | 2032.064 | 1560.462 | 1435.855 | 0.995 | 0.918 |
| P569 | 36460398 | 232.168 | 0.00469 | 0.01259 | 2036.557 | 1308.821 | 1178.66  | 0.981 | 0.869 |
| P570 | 27359021 | 197.823 | 0.00172 | 0.00683 | 1896.44  | 1373.466 | 1074.201 | 0.982 | 0.904 |
| P571 | 29779109 | 230.191 | 0.00591 | 0.00795 | 1796.845 | 1234.285 | 1109.992 | 0.977 | 0.869 |
| P572 | 32207999 | 238.788 | 0.003   | 0.00281 | 1600.087 | 1194.157 | 1082.957 | 0.987 | 0.897 |
| P573 | 51281716 | 217.1   | 0.00296 | 1e-06   | 1977.452 | 1184.582 | 1114.162 | 0.985 | 0.882 |
| P574 | 64055475 | 241.8   | 0.00351 | 1e-06   | 2260.266 | 1406.102 | 1379.475 | 0.996 | 0.862 |
| P575 | 57594002 | 245.676 | 0.00279 | 0.00231 | 3147.49  | 1477.07  | 1318.96  | 0.993 | 0.853 |
| P576 | 17963799 | 244.602 | 0.00223 | 0.01453 | 1216.738 | 868.905  | 773.866  | 0.939 | 0.862 |
| P577 | 30019431 | 227.443 | 0.00182 | 0.00052 | 1680.634 | 1300.503 | 1137.314 | 0.986 | 0.893 |

|      |          |         |         |         |          |          |          |       |       |
|------|----------|---------|---------|---------|----------|----------|----------|-------|-------|
| P578 | 28023510 | 226.05  | 0.00146 | 0.00092 | 1810.68  | 1235.804 | 1059.679 | 0.981 | 0.84  |
| P579 | 20298901 | 262.777 | 0.00215 | 0.01813 | 1303.175 | 933.544  | 851.795  | 0.941 | 0.836 |
| P580 | 29209101 | 206.927 | 0.0025  | 0.00232 | 1465.636 | 994.864  | 945.594  | 0.993 | 0.903 |
| P581 | 55420662 | 235.373 | 0.00156 | 0.00185 | 2811.554 | 1719.364 | 1683.12  | 0.998 | 0.905 |
| P582 | 32849831 | 252.719 | 0.00209 | 0.00311 | 2189.874 | 1422.084 | 1260.018 | 0.987 | 0.861 |
| P583 | 22882356 | 235.914 | 0.00289 | 0.01494 | 1594.52  | 1044.756 | 945.032  | 0.97  | 0.879 |
| P584 | 21965780 | 234.412 | 0.0026  | 1e-06   | 1537.724 | 1044.105 | 915.882  | 0.972 | 0.875 |
| P585 | 55001891 | 310.683 | 0.00138 | 0.00206 | 3363.675 | 2391.188 | 1900.128 | 0.968 | 0.797 |
| P586 | 25780370 | 277.416 | 0.0031  | 0.0026  | 1888.355 | 1220.563 | 921.153  | 0.907 | 0.918 |
| P587 | 26528939 | 198.72  | 0.00344 | 0.00094 | 1605.514 | 1000.36  | 862.145  | 0.96  | 0.777 |
| P588 | 24820063 | 252.759 | 0.0027  | 0.01155 | 1700.347 | 1114.972 | 1069.409 | 0.985 | 0.865 |
| P589 | 59395311 | 190.925 | 0.00361 | 0.00336 | 2274.715 | 1249.815 | 1107.36  | 0.975 | 0.883 |
| P590 | 27518162 | 234.533 | 0.0051  | 0.00225 | 1314.813 | 1003.477 | 963.295  | 0.988 | 0.756 |
| P591 | 3716016  | 225.88  | 0.00619 | 1e-06   | 1405.238 | 1233.827 | 1214.68  | 0.997 | 0.77  |
| P592 | 9026380  | 226.1   | 0.00387 | 1e-06   | 1876.617 | 1541.889 | 1242.198 | 0.999 | 0.764 |
| P593 | 36666596 | 236.726 | 0.00354 | 0.01207 | 2044.155 | 1310.237 | 1180.904 | 0.981 | 0.869 |
| P594 | 42852834 | 235.284 | 0.00436 | 0.0216  | 2267.848 | 1382.254 | 1246.38  | 0.984 | 0.869 |
| P595 | 41298541 | 214.2   | 0.00286 | 0.04664 | 1517.622 | 1065.849 | 873.438  | 0.942 | 0.862 |
| P596 | 41703370 | 241.274 | 0.00106 | 0.01128 | 2224.171 | 1367.338 | 1234.188 | 0.983 | 0.869 |
| P597 | 28280720 | 230.736 | 0.0051  | 0.00176 | 1628.612 | 1162.172 | 1132.144 | 0.992 | 0.91  |
| P598 | 33423335 | 232.364 | 0.00145 | 0.00047 | 1945.428 | 1412.008 | 1253.967 | 0.994 | 0.918 |
| P599 | 23465953 | 260.064 | 0.00161 | 0.00122 | 1104.115 | 825.719  | 766.334  | 0.954 | 0.867 |
| P600 | 55303457 | 240.858 | 0.00121 | 0.00222 | 3154.598 | 1978.306 | 1889.28  | 0.997 | 0.901 |
| P601 | 55016608 | 199.2   | 0.00347 | 1e-06   | 2147.884 | 1429.007 | 1362.618 | 0.99  | 0.872 |
| P602 | 21510523 | 253.515 | 0.00572 | 0.05503 | 1478.008 | 1142.525 | 1102.811 | 0.99  | 0.878 |
| P603 | 57419503 | 247.801 | 0.00211 | 0.00056 | 3224.916 | 1925.785 | 1914.864 | 0.998 | 0.89  |
| P604 | 25434516 | 252.677 | 0.00294 | 0.02454 | 1568.945 | 1104.37  | 1004.297 | 0.983 | 0.796 |
| P605 | 48742865 | 254.185 | 0.00257 | 4e-04   | 2737.214 | 1753.884 | 1670.128 | 0.997 | 0.893 |
| P606 | 39306043 | 235.764 | 0.00342 | 0.00849 | 2140.268 | 1341.188 | 1209.737 | 0.982 | 0.869 |
| P607 | 44321814 | 193.397 | 0.00301 | 0.00188 | 3059.503 | 1642.666 | 1383.666 | 0.992 | 0.884 |
| P608 | 40890384 | 205.817 | 0.0022  | 0.09964 | 2841.514 | 784.921  | 685.37   | 0.969 | 0.819 |
| P609 | 23255053 | 261.193 | 0.00256 | 0.01378 | 1607.094 | 1151.764 | 1098.666 | 0.98  | 0.875 |
| P610 | 32399826 | 266.399 | 0.00148 | 0.00047 | 1786.323 | 1291.868 | 1146.088 | 0.99  | 0.887 |
| P611 | 23721690 | 248.804 | 0.00182 | 0.01704 | 1534.564 | 1073.123 | 984.923  | 0.965 | 0.852 |
| P612 | 40723735 | 235.241 | 0.00389 | 0.00966 | 2191.373 | 1357.775 | 1224.033 | 0.983 | 0.869 |
| P613 | 22213908 | 247.035 | 0.00382 | 0.00865 | 1520.651 | 1180.654 | 1093.464 | 0.99  | 0.877 |
| P614 | 14850930 | 234.731 | 0.00328 | 0.02004 | 1255.9   | 1062.569 | 953.081  | 0.969 | 0.868 |
| P615 | 16230914 | 240.163 | 0.00212 | 0.01167 | 1305.849 | 1080.683 | 967.657  | 0.97  | 0.869 |
| P616 | 27807904 | 252.077 | 0.0027  | 0.0103  | 1917.666 | 1267.356 | 1200.376 | 0.99  | 0.869 |
| P617 | 32856808 | 268.72  | 0.00124 | 0.00096 | 2096.402 | 965.032  | 969.47   | 0.992 | 0.803 |
| P618 | 34345488 | 262.129 | 0.00146 | 0.00073 | 1897.428 | 1509.159 | 1130.706 | 0.989 | 0.891 |
| P619 | 32945043 | 234.97  | 0.00232 | 0.00104 | 1858.079 | 1273.942 | 1243.769 | 0.994 | 0.9   |
| P620 | 20338634 | 211.194 | 0.00314 | 0.01864 | 1300.605 | 867.449  | 752.411  | 0.932 | 0.83  |
| P621 | 26093267 | 191.057 | 0.00223 | 0.0149  | 1871.759 | 1067.565 | 940.255  | 0.954 | 0.888 |
| P622 | 50344717 | 194.106 | 0.00247 | 0.02279 | 3380.312 | 1673.727 | 1551.818 | 0.994 | 0.849 |
| P623 | 44237443 | 211.996 | 0.00217 | 0.00071 | 2256.552 | 1418.164 | 1086.779 | 0.99  | 0.908 |
| P624 | 14826051 | 238.654 | 0.00346 | 0.00065 | 993.403  | 866.427  | 585.704  | 0.903 | 0.862 |
| P625 | 40196929 | 235.556 | 0.0029  | 0.00047 | 2270.526 | 1431.656 | 1402.187 | 0.997 | 0.893 |
| P626 | 37920361 | 228.2   | 0.00275 | 0.03273 | 1354.976 | 938.629  | 823.736  | 0.957 | 0.867 |
| P627 | 28692211 | 258.169 | 0.002   | 0.00042 | 1609.539 | 1262.117 | 1196.396 | 0.994 | 0.897 |
| P628 | 47195559 | 236.563 | 0.00342 | 0.00981 | 2424.837 | 1430.674 | 1290.917 | 0.986 | 0.87  |
| P629 | 22426645 | 251.572 | 0.00371 | 0.01456 | 1542.483 | 1031.491 | 909.331  | 0.963 | 0.869 |
| P630 | 34455955 | 235.585 | 0.00293 | 0.00814 | 1964.425 | 1285.746 | 1158.718 | 0.98  | 0.869 |
| P631 | 32990730 | 229.118 | 0.00387 | 0.00309 | 1906.627 | 1339.137 | 1261.116 | 0.993 | 0.91  |
| P632 | 48419887 | 243.637 | 0.00381 | 0.10503 | 1707.121 | 1082.293 | 1028.973 | 0.982 | 0.86  |
| P633 | 25326703 | 228.807 | 0.00483 | 1e-06   | 1753.134 | 1267.445 | 1264.549 | 0.997 | 0.88  |
| P634 | 63453374 | 225.4   | 0.00294 | 0.05667 | 2251.574 | 1603.14  | 1496.982 | 0.995 | 0.863 |
| P635 | 38401462 | 230.575 | 0.00545 | 0.0157  | 2106.296 | 1330.501 | 1199.617 | 0.982 | 0.869 |

|      |          |         |         |         |          |          |          |       |       |
|------|----------|---------|---------|---------|----------|----------|----------|-------|-------|
| P636 | 57104564 | 229.846 | 0.00132 | 0.00277 | 3213.137 | 1677.871 | 1594.498 | 0.998 | 0.888 |
|------|----------|---------|---------|---------|----------|----------|----------|-------|-------|

---
