# Supplementary material for: Genomic Mutations of Primary and Metastatic Lung Adenocarcinoma in Chinese Patients
Source: Hindawi journal article supplement (doi:10.1155/2020/6615575), 2020-12-08

**Supplemental Figure 1. The association between TMB and PD-L1 in PR and MT patients**

PDL1    Negative    Positive

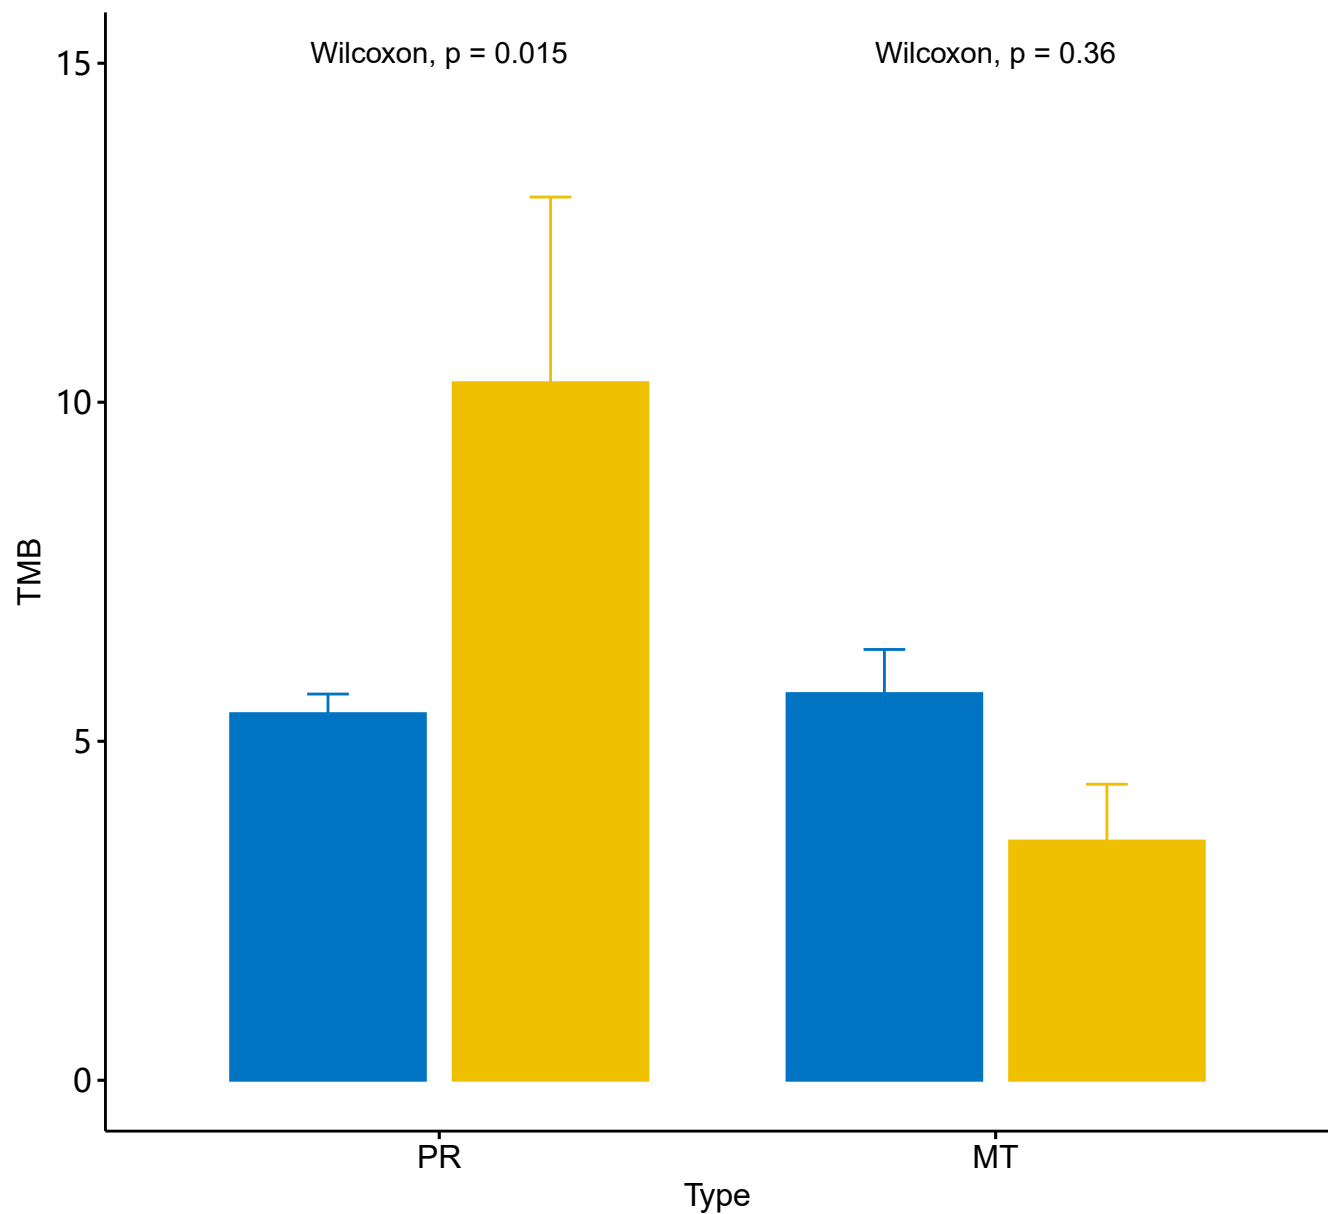

Supplement: f1 [file 6615575.f1.zip]
